# Supplementary material for: Visual Data Mining of Biological Networks: One Size Does Not Fit All
Source: PLoS Comput Biol. 2013 Jan 10;9(1):e1002833. doi: 10.1371/journal.pcbi.1002833 (PMC3547662; doi:10.1371/journal.pcbi.1002833)
Supplement: Table S1 — Lists of genes used for the analysis. (XLS) [file pcbi.1002833.s014.xls]

## Sheet: CENSUS
Symbol	Name	GeneID	Chr	Chr Band	Cancer Somatic Mut	Cancer Germline Mut	Tumour Types (Somatic Mutations)	Tumour Types (Germline Mutations)	Cancer Syndrome	Tissue Type	Cancer Molecular Genetics	Mutation Type	Translocation Partner	Other Germline Mut	Other Syndrome/Disease	Downloaded Feb 8, 2012
ABL1	v-abl Abelson murine leukemia viral oncogene homolog 1	25	9	9q34.1	yes		CML, ALL, T-ALL			L	Dom	T, Mis	BCR, ETV6, NUP214
ABL2	v-abl Abelson murine leukemia viral oncogene homolog 2	27	1	1q24-q25	yes		AML			L	Dom	T	ETV6
ACSL3	acyl-CoA synthetase long-chain family member 3	2181	2	2q36	yes		prostate			E	Dom	T	ETV1
AF15Q14	AF15q14 protein	57082	15	15q14	yes		AML			L	Dom	T	MLL
AF1Q	ALL1-fused gene from chromosome 1q	10962	1	1q21	yes		ALL			L	Dom	T	MLL
AF3p21	SH3 protein interacting with Nck, 90 kDa (ALL1 fused gene from 3p21)	51517	3	3p21	yes		ALL			L	Dom	T	MLL
AF5q31	ALL1 fused gene from 5q31	27125	5	5q31	yes		ALL			L	Dom	T	MLL
AKAP9	A kinase (PRKA) anchor protein (yotiao) 9	10142	7	7q21-q22	yes		papillary thyroid			E	Dom	T	BRAF
AKT1	v-akt murine thymoma viral oncogene homolog 1	207	14	14q32.32	yes		breast, colorectal, ovarian, NSCLC			E	Dom	Mis
AKT2	v-akt murine thymoma viral oncogene homolog 2	208	19	19q13.1-q13.2	yes		ovarian, pancreatic			E	Dom	A
ALDH2	aldehyde dehydrogenase 2 family (mitochondrial)	217	12	12q24.2	yes		leiomyoma			M	Dom	T	HMGA2
ALK	anaplastic lymphoma kinase (Ki-1)	238	2	2p23	yes	yes	ALCL, NSCLC, Neuroblastoma	neuroblastoma	Familial neuroblastoma	L, E, M	Dom	T, Mis, A	NPM1, TPM3, TFG, TPM4, ATIC, CLTC, MSN, ALO17, CARS, EML4
ALO17	KIAA1618 protein	57714	17	17q25.3	yes		ALCL			L	Dom	T	ALK
APC	adenomatous polyposis of the colon gene	324	5	5q21	yes	yes	colorectal, pancreatic, desmoid, hepatoblastoma, glioma, other CNS	colorectal, pancreatic, desmoid, hepatoblastoma, glioma, other CNS	Adenomatous polyposis coli; Turcot syndrome	E, M, O	Rec	D, Mis, N, F, S
ARHGEF12	RHO guanine nucleotide exchange factor (GEF) 12 (LARG)	23365	11	11q23.3	yes		AML			L	Dom	T	MLL
ARHH	RAS homolog gene family, member H (TTF)	399	4	4p13	yes		NHL			L	Dom	T	BCL6
ARID1A	AT rich interactive domain 1A (SWI-like)	8289	1	1p35.3	yes		clear cell ovarian carcinoma, RCC			E	Rec	Mis, N, F, S, D
ARID2	AT rich interactive domain 2	196528	12	12q12	yes		hepatocellular carcinoma			E	Rec	N, S, F
ARNT	aryl hydrocarbon receptor nuclear translocator	405	1	1q21	yes		AML			L	Dom	T	ETV6
ASPSCR1	alveolar soft part sarcoma chromosome region, candidate 1	79058	17	17q25	yes		alveolar soft part sarcoma			M	Dom	T	TFE3
ASXL1	additional sex combs like 1	171023	20	20q11.1	yes		MDS, CMML			L	Rec	F, N, Mis
ATF1	activating transcription factor 1	466	12	12q13	yes		malignant melanoma of soft parts , angiomatoid fibrous histiocytoma			E, M	Dom	T	EWSR1, FUS
ATIC	5-aminoimidazole-4-carboxamide ribonucleotide formyltransferase/IMP cyclohydrolase	471	2	2q35	yes		ALCL			L	Dom	T	ALK
ATM	ataxia telangiectasia mutated	472	11	11q22.3	yes	yes	T-PLL	leukemia, lymphoma, medulloblastoma, glioma	Ataxia-telangiectasia	L, O	Rec	D, Mis, N, F, S
ATRX	alpha thalassemia/mental retardation syndrome X-linked	546	X	Xq21.1	yes		Pancreatic neuroendocrine tumors			E	Rec	Mis, F, N		yes	ATR-X (alpha thalassemia/mental retardation) syndrome
BAP1	BRCA1 associated protein-1 (ubiquitin carboxy-terminal hydrolase)	8314	3	3p21.31-p21.2	yes		uveal melanoma, breast, NSCLC, RCC	mesothelioma, uveal melanoma		E	Rec	N, Mis, F, S, O
BCL10	B-cell CLL/lymphoma 10	8915	1	1p22	yes		MALT			L	Dom	T	IGH@
BCL11A	B-cell CLL/lymphoma 11A	53335	2	2p13	yes		B-CLL			L	Dom	T	IGH@
BCL11B	B-cell CLL/lymphoma 11B (CTIP2)	64919	14	14q32.1	yes		T-ALL			L	Dom	T	TLX3
BCL2	B-cell CLL/lymphoma 2	596	18	18q21.3	yes		NHL, CLL			L	Dom	T	IGH@
BCL3	B-cell CLL/lymphoma 3	602	19	19q13	yes		CLL			L	Dom	T	IGH@
BCL5	B-cell CLL/lymphoma 5	603	17	17q22	yes		CLL			L	Dom	T	MYC
BCL6	B-cell CLL/lymphoma 6	604	3	3q27	yes		NHL, CLL			L	Dom	T, Mis	IG loci, ZNFN1A1, LCP1, PIM1, TFRC, CIITA, NACA, HSPCB, HSPCA, HIST1H4I, IL21R, POU2AF1, ARHH, EIF4A2, SFRS3
BCL7A	B-cell CLL/lymphoma 7A	605	12	12q24.1	yes		BNHL			L	Dom	T	MYC
BCL9	B-cell CLL/lymphoma 9	607	1	1q21	yes		B-ALL			L	Dom	T	IGH@, IGL@
BCOR	BCL6 corepressor	54880	X	Xp11.4	yes		retinoblastoma, AML, APL(translocation)				Rec	F, N, S, T	RARA	yes	oculo-facio-cardio-dental genetic
BCR	breakpoint cluster region	613	22	22q11.21	yes		CML, ALL, AML			L	Dom	T	ABL1, FGFR1, JAK2
BHD	folliculin, Birt-Hogg-Dube syndrome	201163	17	17p11.2		yes		renal, fibrofolliculomas, trichodiscomas	Birt-Hogg-Dube syndrome	E, M	Rec?	Mis. N, F
BIRC3	baculoviral IAP repeat-containing 3	330	11	11q22-q23	yes		MALT			L	Dom	T	MALT1
BLM	Bloom Syndrome	641	15	15q26.1		yes		leukemia, lymphoma, skin squamous cell , other cancers	Bloom Syndrome	L, E	Rec	Mis, N, F
BMPR1A	bone morphogenetic protein receptor, type IA	657	10	10q22.3		yes		gastrointestinal polyps	Juvenile polyposis	E	Rec	Mis, N, F
BRAF	v-raf murine sarcoma viral oncogene homolog B1	673	7	7q34	yes		melanoma, colorectal, papillary thyroid, borderline ov, Non small-cell lung cancer (NSCLC), cholangiocarcinoma, pilocytic astrocytoma			E	Dom	Mis, T, O	AKAP9, KIAA1549	yes	Cardio-facio-cutaneous syndrome
BRCA1	familial breast/ovarian cancer gene 1	672	17	17q21	yes	yes	ovarian	breast, ovarian	Hereditary breast/ovarian cancer	E	Rec	D, Mis, N, F, S
BRCA2	familial breast/ovarian cancer gene 2	675	13	13q12	yes	yes	breast, ovarian, pancreatic	breast, ovarian, pancreatic, leukemia (FANCB, FANCD1)	Hereditary breast/ovarian cancer	L, E	Rec	D, Mis, N, F, S
BRD3	bromodomain containing 3	8019	9	9q34	yes		lethal midline carcinoma of young people			E	Dom	T	C15orf55
BRD4	bromodomain containing 4	23476	19	19p13.1	yes		lethal midline carcinoma of young people			E	Dom	T	C15orf55
BRIP1	BRCA1 interacting protein C-terminal helicase 1	83990	17	17q22		yes		AML, leukemia, breast	Fanconi anaemia J, breast cancer susceptiblity	L, E	Rec	F, N, Mis
BTG1	B-cell translocation gene 1, anti-proliferative	694	12	12q22	yes		BCLL			L	Dom	T	MYC
BUB1B	BUB1 budding uninhibited by benzimidazoles 1 homolog beta (yeast)	701	15	15q15		yes		rhabdomyosarcoma	Mosaic variegated aneuploidy	M	Rec	Mis, N, F, S
C12orf9	chromosome 12 open reading frame 9	93669	12	12q14.3	yes		lipoma			M	Dom	T	LPP
C15orf21	chromosome 15 open reading frame 21	283651	15	15q21.1	yes		prostate			E	Dom	T	ETV1
C15orf55	chromosome 15 open reading frame 55	256646	15	15q14	yes		lethal midline carcinoma			E	Dom	T	BRD3, BRD4
C16orf75	chromosome 16 open reading frame 75	116028	16	16p13.13	yes		PMBL, Hodgkin Lymphona,			L	Dom	T	CIITA
CANT1	calcium activated nucleotidase 1	124583	17	17q25	yes		prostate			E	Dom	T	ETV4
CARD11	caspase recruitment domain family, member 11	84433	7	7p22	yes		DLBCL			L	Dom	Mis
CARS	cysteinyl-tRNA synthetase	833	11	11p15.5	yes		ALCL			L	Dom	T	ALK
CBFA2T1	core-binding factor, runt domain, alpha subunit 2;translocated to, 1 (ETO)	862	8	8q22	yes		AML			L	Dom	T	MLL, RUNX1
CBFA2T3	core-binding factor, runt domain, alpha subunit 2; translocated to, 3 (MTG-16)	863	16	16q24	yes		AML			L	Dom	T	RUNX1
CBFB	core-binding factor, beta subunit	865	16	16q22	yes		AML			L	Dom	T	MYH11
CBL	Cas-Br-M (murine) ecotropic retroviral transforming	867	11	11q23.3	yes		AML, JMML, MDS			L	Dom, Rec	T, Mis S, O	MLL
CBLB	Cas-Br-M (murine) ecotropic retroviral transforming sequence b	868	3	3q13.11	yes		AML			L	Rec	Mis S
CBLC	Cas-Br-M (murine) ecotropic retroviral transforming sequence c	23624	19	19q13.2	yes		AML			L	Rec	M
CCNB1IP1	cyclin B1 interacting protein 1, E3 ubiquitin protein ligase	57820	14	14q11.2	yes		leiomyoma			M	Dom	T	HMGA2
CCND1	cyclin D1	595	11	11q13	yes		CLL, B-ALL, breast			L, E	Dom	T	IGH@, FSTL3
CCND2	cyclin D2	894	12	12p13	yes		NHL,CLL			L	Dom	T	IGL@
CCND3	cyclin D3	896	6	6p21	yes		MM			L	Dom	T	IGH@
CCNE1	cyclin E1	898	19	19q12	yes		serous ovarian			E	Dom	A
CD273	programmed cell death 1 ligand 2	80380	9	9p24.2	yes		PMBL, Hodgkin Lymphona,			L	Dom	T	CIITA
CD274	CD274 molecule	29126	9	9p24	yes		PMBL, Hodgkin Lymphona,			L	Dom	T	CIITA
CD74	CD74 molecule, major histocompatibility complex, class II invariant chain	972	5	5q32	yes		NSCLC			E	Dom	T	ROS1
CD79A	CD79a molecule, immunoglobulin-associated alpha	973	19	19q13.2	yes		DLBCL			L	Dom	O, S
CD79B	CD79b molecule, immunoglobulin-associated beta	974	17	17q23	yes		DLBCL			L	Dom	Mis, O
CDH1	cadherin 1, type 1, E-cadherin (epithelial) (ECAD)	999	16	16q22.1	yes	yes	lobular breast, gastric	gastric	Familial gastric carcinoma	E	Rec	Mis, N, F, S
CDH11	cadherin 11, type 2, OB-cadherin (osteoblast)	1009	16	16q22.1	yes		aneurysmal bone cysts			M	Dom	T	USP6
CDK12	cyclin-dependent kinase 12	51755	17	17q12	yes		serous ovarian			E	Rec	Mis, N, F
CDK4	cyclin-dependent kinase 4	1019	12	12q14		yes		melanoma	Familial malignant melanoma	E	Dom	Mis
CDK6	cyclin-dependent kinase 6	1021	7	7q21-q22	yes		ALL			L	Dom	T	MLLT10
CDKN2A	cyclin-dependent kinase inhibitor 2A (p16(INK4a)) gene	1029	9	9p21	yes	yes	melanoma, multiple other tumour types	melanoma, pancreatic	Familial malignant melanoma	L, E, M, O	Rec	D, Mis, N, F, S
CDKN2a(p14)	cyclin-dependent kinase inhibitor 2A-- p14ARF protein	1029	9	9p21	yes	yes	melanoma, multiple other tumour types	melanoma, pancreatic	Familial malignant melanoma	L, E, M, O	Rec	D, S
CDKN2C	cyclin-dependent kinase inhibitor 2C (p18, inhibits CDK4)	1031	1	1p32	yes		glioma, MM			O, L	Rec	D
CDX2	caudal type homeo box transcription factor 2	1045	13	13q12.3	yes		AML			L	Dom	T	ETV6
CEBPA	CCAAT/enhancer binding protein (C/EBP), alpha	1050	19	19q13.1	yes		AML, MDS			L	Dom	Mis, N, F
CEP1	centrosomal protein 1	11064	9	9q33	yes		MPD, NHL			L	Dom	T	FGFR1
CHCHD7	coiled-coil-helix-coiled-coil-helix domain containing 7	79145	8	8q11.2	yes		salivary adenoma			E	Dom	T	PLAG1
CHEK2	CHK2 checkpoint homolog (S. pombe)	11200	22	22q12.1		yes		breast	familial breast cancer	E	Rec	F
CHIC2	cysteine-rich hydrophobic domain 2	26511	4	4q11-q12	yes		AML			L	Dom	T	ETV6
CHN1	chimerin (chimaerin) 1	1123	2	2q31-q32.1	yes		extraskeletal myxoid chondrosarcoma			M	Dom	T	TAF15
CIC	capicua homolog	23152	19	19q13.2	yes		oligodendroglioma			O	Rec	Mis, F, S
CIITA	class II, major histocompatibility complex, transactivator	4261	16	16p13	yes		PMBL, Hodgkin Lymphona,			L	Dom	T	FLJ27352, CD274, CD273, RALGDS, RUNDC2A, C16orf75, BCL6
CLTC	clathrin, heavy polypeptide (Hc)	1213	17	17q11-qter	yes		ALCL, renal			L	Dom	T	ALK, TFE3
CLTCL1	clathrin, heavy polypeptide-like 1	8218	22	22q11.21	yes		ALCL			L	Dom	T	?
CMKOR1	chemokine orphan receptor 1	57007	2	2q37.3	yes		lipoma			M	Dom	T	HMGA2
COL1A1	collagen, type I, alpha 1	1277	17	17q21.31-q22	yes		dermatofibrosarcoma protuberans, aneurysmal bone cyst			M	Dom	T	PDGFB, USP6	yes	Osteogenesis imperfecta
COPEB	core promoter element binding protein (KLF6)	1316	10	10p15	yes		prostate, glioma			E, O	Rec	Mis, N
COX6C	cytochrome c oxidase subunit VIc	1345	8	8q22-q23	yes		uterine leiomyoma			M	Dom	T	HMGA2
CREB1	cAMP responsive element binding protein 1	1385	2	2q34	yes		clear cell sarcoma, angiomatoid fibrous histiocytoma			M	Dom	T	EWSR1
CREB3L1	cAMP responsive element binding protein 3-like 1	90993	11	11p11.2	yes		myxofibrosarcoma			M	Dom	T	FUS
CREB3L2	cAMP responsive element binding protein 3-like 2	64764	7	7q34	yes		fibromyxoid sarcoma			M	Dom	T	FUS
CREBBP	CREB binding protein (CBP)	1387	16	16p13.3	yes		ALL, AML, DLBCL, B-NHL			L	Dom/Rec	T, N, F, Mis, O	MLL, MORF, RUNXBP2	yes	Rubinstein-Taybi syndrome
CRLF2	cytokine receptor-like factor 2	64109	X,Y	Xp22.3; Yp11.3	yes		B-ALL, Downs associated ALL			L	Dom	Mis, T	P2RY8, IGH@
CRTC3	CREB regulated transcription coactivator 3	64784	15	15q26.1	yes		salivary gland mucoepidermoid			E	Dom	T	MAML2
CTNNB1	catenin (cadherin-associated protein), beta 1	1499	3	3p22-p21.3	yes		colorectal, cvarian, hepatoblastoma, others, pleomorphic salivary adenoma			E, M, O	Dom	H, Mis, T	PLAG1
CYLD	familial cylindromatosis gene	1540	16	16q12-q13	yes	yes	cylindroma	cylindroma	Familial cylindromatosis	E	Rec	Mis, N, F, S
D10S170	DNA segment on chromosome 10 (unique) 170, H4 gene (PTC1)	8030	10	10q21	yes		papillary thyroid, CML			E	Dom	T	RET, PDGFRB
DAXX	death-domain associated protein	1616	6	6p21.3	yes		Pancreatic neuroendocrine tumors			E	Rec	Mis, F, N
DDB2	damage-specific DNA binding protein 2	1643	11	11p12		yes		skin basal cell, skin squamous cell, melanoma	Xeroderma pigmentosum (E)	E	Rec	Mis, N
DDIT3	DNA-damage-inducible transcript 3	1649	12	12q13.1-q13.2	yes		liposarcoma			M	Dom	T	FUS
DDX10	DEAD (Asp-Glu-Ala-Asp) box polypeptide 10	1662	11	11q22-q23	yes		AML*			L	Dom	T	NUP98
DDX5	DEAD (Asp-Glu-Ala-Asp) box polypeptide 5	1655	17	17q21	yes		prostate			E	Dom	T	ETV4
DDX6	DEAD (Asp-Glu-Ala-Asp) box polypeptide 6	1656	11	11q23.3	yes		B-NHL			L	Dom	T	IGH@
DEK	DEK oncogene (DNA binding)	7913	6	6p23	yes		AML			L	Dom	T	NUP214
DICER1	dicer 1, ribonuclease type III	23405	14	14q32.13	yes	yes	sex cord-stromal tumour, TGCT, embryonal rhadomyosarcoma	pleuropulmonary blastoma	Familial Pleuropulmonary Blastoma	E, M, O	Rec	Mis F, N
DNMT3A	DNA (cytosine-5-)-methyltransferase 3 alpha	1788	2	2p23	yes		AML			L	Rec	Mis, F, N, S
DUX4	double homeobox, 4	22947	4	4q35	yes		soft tissue sarcoma			M	Dom	T	CIC
EBF1	early B-cell factor 1	1879	5	5q34	yes		lipoma			M	Dom	T	HMGA2
EGFR	epidermal growth factor receptor (erythroblastic leukemia viral (v-erb-b) oncogene homolog, avian)	1956	7	7p12.3-p12.1	yes	yes	glioma, NSCLC	NSCLC	Familial lung cancer	E, O	Dom	A, O, Mis
EIF4A2	eukaryotic translation initiation factor 4A, isoform 2	1974	3	3q27.3	yes		NHL			L	Dom	T	BCL6
ELF4	E74-like factor 4 (ets domain transcription factor)	2000	X	Xq26	yes		AML			L	Dom	T	ERG
ELK4	ELK4, ETS-domain protein (SRF accessory protein 1)	2005	1	1q32	yes		prostate			E	Dom	T	SLC45A3
ELKS	ELKS protein	23085	12	12p13.3	yes		papillary thyroid			E	Dom	T	RET
ELL	ELL gene (11-19 lysine-rich leukemia gene)	8178	19	19p13.1	yes		AL			L	Dom	T	MLL
ELN	elastin	2006	7	7q11.23	yes		B-ALL			L	Dom	T	PAX5	yes	Supravalvular Aortic Stenosis, Cutis laxa , Williams-Beuren Syndrome
EML4	echinoderm microtubule associated protein like 4	27436	2	2p21	yes		NSCLC			E	Dom	T	ALK
EP300	300 kd E1A-Binding protein gene	2033	22	22q13	yes		colorectal, breast, pancreatic, AML, ALL, DLBCL			L, E	Rec	T, N, F, Mis, O	MLL, RUNXBP2
EPS15	epidermal growth factor receptor pathway substrate 15 (AF1p)	2060	1	1p32	yes		ALL			L	Dom	T	MLL
ERBB2	v-erb-b2 erythroblastic leukemia viral oncogene homolog 2, neuro/glioblastoma derived oncogene homolog (avian)	2064	17	17q21.1	yes		breast, ovarian, other tumour types, NSCLC, gastric			E	Dom	A, Mis, O
ERCC2	excision repair cross-complementing rodent repair deficiency, complementation group 2 (xeroderma pigmentosum D)	2068	19	19q13.2-q13.3		yes		skin basal cell, skin squamous cell, melanoma	Xeroderma pigmentosum (D)	E	Rec	Mis, N, F, S
ERCC3	excision repair cross-complementing rodent repair deficiency, complementation group 3 (xeroderma pigmentosum group B complementing)	2071	2	2q21		yes		skin basal cell, skin squamous cell, melanoma	Xeroderma pigmentosum (B)	E	Rec	Mis, S
ERCC4	excision repair cross-complementing rodent repair deficiency, complementation group 4	2072	16	16p13.3-p13.13		yes		skin basal cell, skin squamous cell, melanoma	Xeroderma pigmentosum (F)	E	Rec	Mis, N, F
ERCC5	excision repair cross-complementing rodent repair deficiency, complementation group 5 (xeroderma pigmentosum, complementation group G (Cockayne syndrome))	2073	13	13q33		yes		skin basal cell, skin squamous cell, melanoma	Xeroderma pigmentosum (G)	E	Rec	Mis, N, F
ERG	v-ets erythroblastosis virus E26 oncogene like (avian)	2078	21	21q22.3	yes		Ewing sarcoma, prostate, AML			M, E, L	Dom	T	EWSR1, TMPRSS2, ELF4, FUS, HERPUD1, NDRG1
ETV1	ets variant gene 1	2115	7	7p22	yes		Ewing sarcoma, prostate			M, E	Dom	T	EWSR1, TMPRSS2, SLC45A3, C15orf21, HNRNPA2B1. ACSL3
ETV4	ets variant gene 4 (E1A enhancer binding protein, E1AF)	2118	17	17q21	yes		Ewing sarcoma, Prostate carcinoma			M, E	Dom	T	EWSR1, TMPRSS2, DDX5, KLK2, CANT1
ETV5	ets variant gene 5	2119	3	3q28	yes		Prostate			E	Dom	T	TMPRSS2, SCL45A3
ETV6	ets variant gene 6 (TEL oncogene)	2120	12	12p13	yes		congenital fibrosarcoma, multiple leukemia and lymphoma, secretory breast, MDS, ALL			L, E, M	Dom	T	NTRK3, RUNX1, PDGFRB, ABL1, MN1, ABL2, FACL6, CHIC2, ARNT, JAK2, EVI1, CDX2, STL, HLXB9, MDS2, PER1, SYK, TTL, FGFR3, PAX5
EVI1	ecotropic viral integration site 1	2122	3	3q26	yes		AML, CML			L	Dom	T	RUNX1, ETV6, PRDM16, RPN1
EWSR1	Ewing sarcoma breakpoint region 1 (EWS)	2130	22	22q12	yes		Ewing sarcoma, desmoplastic small round cell tumor , ALL, clear cell sarcoma, sarcoma, myoepithelioma			L, M	Dom	T	FLI1, ERG, ZNF278, NR4A3, FEV, ATF1, ETV1, ETV4, WT1, ZNF384, CREB1, POU5F1, PBX1
EXT1	multiple exostoses type 1 gene	2131	8	8q24.11-q24.13		yes		exostoses, osteosarcoma	Multiple Exostoses Type 1	M	Rec	Mis, N, F, S
EXT2	multiple exostoses type 2 gene	2132	11	11p12-p11		yes		exostoses, osteosarcoma	Multiple Exostoses Type 2	M	Rec	Mis, N, F, S
EZH2	enhancer of zeste homolog 2	2146	7	7q35-q36	yes		DLBCL			L	Rec?	Mis
FACL6	fatty-acid-coenzyme A ligase, long-chain 6	23305	5	5q31	yes		AML, AEL			L	Dom	T	ETV6
FAM22A	family with sequence similarity 22, member A	728118	10	10q23.2	yes		edometrial stromal sarcoma			M	Dom	T	YWHAE
FAM22B	family with sequence similarity 22, member B	729262	10	10q22.3	yes		edometrial stromal sarcoma			M	Dom	T	YWHAE
FAM46C	family with sequence similarity 46, member C	54855	1	1p12	yes		MM			L	Rec	Mis, F, O
FANCA	Fanconi anemia, complementation group A	2175	16	16q24.3		yes		AML, leukemia	Fanconi anaemia A	L	Rec	D, Mis, N, F, S
FANCC	Fanconi anemia, complementation group C	2176	9	9q22.3		yes		AML, leukemia	Fanconi anaemia C	L	Rec	D, Mis, N, F, S
FANCD2	Fanconi anemia, complementation group D2	2177	3	3p26		yes		AML, leukemia	Fanconi anaemia D2	L	Rec	D, Mis, N, F
FANCE	Fanconi anemia, complementation group E	2178	6	6p21-p22		yes		AML, leukemia	Fanconi anaemia E	L	Rec	N, F, S
FANCF	Fanconi anemia, complementation group F	2188	11	11p15		yes		AML, leukemia	Fanconi anaemia F	L	Rec	N, F
FANCG	Fanconi anemia, complementation group G	2189	9	9p13		yes		AML, leukemia	Fanconi anaemia G	L	Rec	Mis, N, F, S
FBXO11	F-box protein 11	80204	2	2p16.3	yes		DLBCL			L	Rec	Mis, F, D
FBXW7	F-box and WD-40 domain protein 7 (archipelago homolog, Drosophila)	55294	4	4q31.3	yes		colorectal, endometrial, T-ALL			E, L	Rec	Mis, N, D, F
FCGR2B	Fc fragment of IgG, low affinity IIb, receptor for (CD32)	2213	1	1q23	yes		ALL			L	Dom	T	?
FEV	FEV protein - (HSRNAFEV)	54738	2	2q36	yes		Ewing sarcoma			M	Dom	T	EWSR1, FUS
FGFR1	fibroblast growth factor receptor 1	2260	8	8p11.2-p11.1	yes		MPD, NHL			L	Dom	T	BCR, FOP, ZNF198, CEP1	yes	Pfeiffer syndrome, Kallman syndrome
FGFR1OP	FGFR1 oncogene partner (FOP)	11116	6	6q27	yes		MPD, NHL			L	Dom	T	FGFR1
FGFR2	fibroblast growth factor receptor 2	2263	10	10q26	yes		gastric. NSCLC, endometrial			E	Dom	Mis		yes	Crouzon, Pfeiffer, and Apert syndromes
FGFR3	fibroblast growth factor receptor 3	2261	4	4p16.3	yes		bladder, MM, T-cell lymphoma			L, E	Dom	Mis, T	IGH@, ETV6	yes	Hypochondroplasia, Thanatophoric dysplasia
FH	fumarate hydratase	2271	1	1q42.1		yes		lieomyomatosis, renal	hereditary leiomyomatosis and renal cell cancer	E, M	Rec	Mis, N, F
FHIT	fragile histidine triad gene	2272	3	3p14.2	yes		pleomorphic salivary gland adenoma			E	Dom	T	HMGA2
FIP1L1	FIP1 like 1 (S. cerevisiae)	81608	4	4q12	yes		idiopathic hypereosinophilic syndrome			L	Dom	T	PDGFRA
FLI1	Friend leukemia virus integration 1	2313	11	11q24	yes		Ewing sarcoma			M	Dom	T	EWSR1
FLJ27352	BX648577, FLJ27352 hypothetical LOC145788	145788	15	15q21.3	yes		PMBL, Hodgkin Lymphona,			L	Dom	T	CIITA
FLT3	fms-related tyrosine kinase 3	2322	13	13q12	yes		AML, ALL			L	Dom	Mis, O
FNBP1	formin binding protein 1 (FBP17)	23048	9	9q23	yes		AML			L	Dom	T	MLL
FOXL2	forkhead box L2	668	3	3q23	yes		granulosa-cell tumour of the ovary			O	Dom	Mis		yes	Blepharophimosis, ptosis and epicanthus inversus Types I, II; Premature ovarian failure type III
FOXO1A	forkhead box O1A (FKHR)	2308	13	13q14.1	yes		alveolar rhabdomyosarcomas			M	Dom	T	PAX3
FOXO3A	forkhead box O3A	2309	6	6q21	yes		AL			L	Dom	T	MLL
FOXP1	forkhead box P1	27086	3	3p14.1	yes		ALL			L	Dom	T	PAX5
FSTL3	follistatin-like 3 (secreted glycoprotein)	10272	19	19p13	yes		B-CLL			L	Dom	T	CCND1
FUBP1	far upstream element (FUSE) binding protein 1	8880	1	1p13.1	yes		oligodendroglioma			O	Rec	F, N
FUS	fusion, derived from t(12;16) malignant liposarcoma	2521	16	16p11.2	yes		liposarcoma, AML, Ewing sarcoma, angiomatoid fibrous histiocytoma, fibromyxoid sarcoma			M, L	Dom	T	DDIT3, ERG, FEV, ATF1, CREB3L2, CREB3L1
FVT1	follicular lymphoma variant translocation 1	2531	18	18q21.3	yes		B-NHL			L	Dom	T	IGK@
GAS7	growth arrest-specific 7	8522	17	17p	yes		AML*			L	Dom	T	MLL
GATA1	GATA binding protein 1 (globin transcription factor 1)	2623	X	Xp11.23	yes		megakaryoblastic leukemia of Downs Syndrome			L	Dom	Mis, F
GATA2	GATA binding protein 2	2624	3	3q21.3	yes		AML(CML blast transformation)			L	Dom	Mis
GATA3	GATA binding protein 3	2625	10	10p15	yes		breast			E	Rec	F, N, S		yes	HDR syndrome (HYPOPARATHYROIDISM, SENSORINEURAL DEAFNESS, AND RENAL DISEASE)
GMPS	guanine monphosphate synthetase	8833	3	3q24	yes		AML			L	Dom	T	MLL
GNA11	guanine nucleotide binding protein (G protein), alpha 11 (Gq class)	2767	19	19p13.3	yes		uveal melanoma			E	Dom	Mis
GNAQ	guanine nucleotide binding protein (G protein), q polypeptide	2776	9	9q21	yes		uveal melanoma			E	Dom	Mis
GNAS	guanine nucleotide binding protein (G protein), alpha stimulating activity polypeptide 1	2778	20	20q13.2	yes		pituitary adenoma			E	Dom	Mis		yes	McCune-Albright syndrome; pseudohypoparathyroidism, type IA
GOLGA5	golgi autoantigen, golgin subfamily a, 5 (PTC5)	9950	14	14q	yes		papillary thyroid			E	Dom	T	RET
GOPC	golgi associated PDZ and coiled-coil motif containing	57120	6	6q21	yes		glioblastoma			O	Dom	O	ROS1
GPC3	glypican 3	2719	X	Xq26.1		yes		Wilms tumour	Simpson-Golabi-Behmel syndrome	O	Rec/X	T, D, Mis, N, F, S
GPHN	gephyrin (GPH)	10243	14	14q24	yes		AL			L	Dom	T	MLL
GRAF	GTPase regulator associated with focal adhesion kinase pp125(FAK)	23092	5	5q31	yes		AML, MDS			L	Dom	T, F, S	MLL
HCMOGT-1	sperm antigen HCMOGT-1	92521	17	17p11.2	yes		JMML			L	Dom	T	PDGFRB
HEAB	ATP_GTP binding protein	10978	11	11q12	yes		AML			L	Dom	T	MLL
HERPUD1	homocysteine-inducible, endoplasmic reticulum stress-inducible, ubiquitin-like domain member 1	9709	16	16q12.2-q13	yes		prostate			E	Dom	T	ERG
HEY1	hairy/enhancer-of-split related with YRPW motif 1	23462	8	8q21	yes		mesenchymal chondrosarcoma			M	Dom	T	NCOA2
HIP1	huntingtin interacting protein 1	3092	7	7q11.23	yes		CMML			L	Dom	T	PDGFRB
HIST1H4I	histone 1, H4i (H4FM)	8294	6	6p21.3	yes		NHL			L	Dom	T	BCL6
HLF	hepatic leukemia factor	3131	17	17q22	yes		ALL			L	Dom	T	TCF3
HLXB9	homeo box HB9	3110	7	7q36	yes		AML			L	Dom	T	ETV6	yes	CURRARINO SYNDROME
HMGA1	high mobility group AT-hook 1	3159	6	6p21	yes		microfollicular thyroid adenoma, various benign mesenchymal tumors,			E, M	Dom	T	?
HMGA2	high mobility group AT-hook 2 (HMGIC)	8091	12	12q15	yes		lipoma, leiomyoma, pleiomorphic salivary gland adenoma			M	Dom	T	LHFP, RAD51L1, LPP, COX6C, CMKOR1, NFIB, ALDH2, CCNB1IP1, EBF1, WIF1, FHIT
HNRNPA2B1	heterogeneous nuclear ribonucleoprotein A2/B1	3181	7	7p15	yes		prostate			E	Dom	T	ETV1
HOOK3	hook homolog 3	84376	8	8p11.21	yes		papillary thyroid			E	Dom	T	RET
HOXA11	homeo box A11	3207	7	7p15-p14.2	yes		CML			L	Dom	T	NUP98
HOXA13	homeo box A13	3209	7	7p15-p14.2	yes		AML			L	Dom	T	NUP98
HOXA9	homeo box A9	3205	7	7p15-p14.2	yes		AML*			L	Dom	T	NUP98, MSI2
HOXC11	homeo box C11	3227	12	12q13.3	yes		AML			L	Dom	T	NUP98
HOXC13	homeo box C13	3229	12	12q13.3	yes		AML			L	Dom	T	NUP98
HOXD11	homeo box D11	3237	2	2q31-q32	yes		AML			L	Dom	T	NUP98
HOXD13	homeo box D13	3239	2	2q31-q32	yes		AML*			L	Dom	T	NUP98
HRAS	v-Ha-ras Harvey rat sarcoma viral oncogene homolog	3265	11	11p15.5	yes	yes	infrequent sarcomas, rare other types	rhadomyosarcoma, ganglioneuroblastoma, bladder	Costello syndrome	E, L, M	Dom	Mis
HRPT2	hyperparathyroidism 2	3279	1	1q21-q31	yes	yes	parathyroid adenoma	parathyroid adenoma, mulitiple ossifying jaw fibroma	Hyperparathyroidism-jaw tumor syndrome	E, M	Rec	Mis, N, F
HSPCA	heat shock 90kDa protein 1, alpha	3320	14	14q32.31	yes		NHL			L	Dom	T	BCL6
HSPCB	heat shock 90kDa protein 1, beta	3326	6	6p12	yes		NHL			L	Dom	T	BCL6
IDH1	isocitrate dehydrogenase 1 (NADP+), soluble	3417	2	2q33.3	yes		gliobastoma			O	Dom	Mis
IDH2	socitrate dehydrogenase 2 (NADP+), mitochondrial	3418	15	15q26.1	yes		GBM			M	Dom	M
IGH@	immunoglobulin heavy locus	3492	14	14q32.33	yes		MM, Burkitt lymphoma, NHL, CLL, B-ALL, MALT, MLCLS			L	Dom	T	MYC, FGFR3,PAX5, IRTA1, IRF4, CCND1, BCL9, BCL8, BCL6, BCL2, BCL3, BCL10, BCL11A. LHX4, DDX6, NFKB2, PAFAH1B2, PCSK7, CRLF2
IGK@	immunoglobulin kappa locus	50802	2	2p12	yes		Burkitt lymphoma, B-NHL			L	Dom	T	MYC, FVT1
IGL@	immunoglobulin lambda locus	3535	22	22q11.1-q11.2	yes		Burkitt lymphoma			L	Dom	T	BCL9, MYC, CCND2
IKZF1	IKAROS family zinc finger 1	10320	7	7p12.2	yes		ALL, DLBCL			L	Rec,Dom	D,T	BCL6
IL2	interleukin 2	3558	4	4q26-q27	yes		intestinal T-cell lymphoma			L	Dom	T	TNFRSF17
IL21R	interleukin 21 receptor	50615	16	16p11	yes		NHL			L	Dom	T	BCL6
IL6ST	interleukin 6 signal transducer (gp130, oncostatin M receptor)	3572	5	5q11	yes		hepatocellular ca			E	Dom	O
IL7R	interleukin 7 receptor	146661	5	5p13	yes		ALL			L	Dom	Mis, O		yes	Severe combined immune deficiency
IRF4	interferon regulatory factor 4	3662	6	6p25-p23	yes		MM			L	Dom	T	IGH@
IRTA1	immunoglobulin superfamily receptor translocation associated 1	83417	1	1q21	yes		B-NHL			L	Dom	T	IGH@
ITK	IL2-inducible T-cell kinase	3702	5	5q31-q32	yes		peripheral T-cell lymphoma			L	Dom	T	SYK
JAK1	Janus kinase 1	3716	1	1p32.3-p31.3	yes		ALL			L	Dom	Mis
JAK2	Janus kinase 2	3717	9	9p24	yes		ALL, AML, MPD, CML			L	Dom	T, Mis, O	ETV6, PCM1, BCR
JAK3	Janus kinase 3	3718	19	19p13.1	yes		acute megakaryocytic leukemia,			L	Dom	Mis
JAZF1	juxtaposed with another zinc finger gene 1	221895	7	7p15.2-p15.1	yes		endometrial stromal tumours			M	Dom	T	SUZ12
JUN	jun oncogene	3725	1	1p32-p31	yes		sarcoma			M	Dom	A
KDM5A	lysine (K)-specific demethylase 5A, JARID1A	5927	12	12p11	yes		AML			L	Dom	T	NUP98
KDM5C	lysine (K)-specific demethylase 5C (JARID1C)	8242	X	Xp11.22-p11.21	yes		clear cell renal carcinoma			E	Rec	N, F, S
KDM6A	lysine (K)-specific demethylase 6A, UTX	7403	X	Xp11.2	yes		renal, oesophageal SCC, MM			E, L	Rec	D, N, F, S
KDR	vascular endothelial growth factor receptor 2	3791	4	4q11-q12	yes		NSCLC, angiosarcoma			E	Dom	Mis
KIAA1549	KIAA1549	57670	7	7q34	yes		pilocytic astrocytoma			O	Dom	O	BRAF
KIT	v-kit Hardy-Zuckerman 4 feline sarcoma viral oncogene homolog	3815	4	4q12	yes	yes	GIST, AML, TGCT, mastocytosis, mucosal melanoma	GIST, epithelioma	Familial gastrointestinal stromal tumour	L, M, O, E	Dom	Mis, O		yes	Piebald trait
KLK2	kallikrein-related peptidase 2	3817	19	19q13.41	yes		prostate			E	Dom	T	ETV4
KRAS	v-Ki-ras2 Kirsten rat sarcoma 2 viral oncogene homolog	3845	12	12p12.1	yes		pancreatic, colorectal, lung, thyroid, AML, others			L, E, M, O	Dom	Mis
KTN1	kinectin 1 (kinesin receptor)	3895	14	14q22.1	yes		papillary thryoid			E	Dom	T	RET
LAF4	lymphoid nuclear protein related to AF4	3899	2	2q11.2-q12	yes		ALL, T-ALL			L	Dom	T	MLL, RUNX1
LASP1	LIM and SH3 protein 1	3927	17	17q11-q21.3	yes		AML			L	Dom	T	MLL
LCK	lymphocyte-specific protein tyrosine kinase	3932	1	1p35-p34.3	yes		T-ALL			L	Dom	T	TRB@
LCP1	lymphocyte cytosolic protein 1 (L-plastin)	3936	13	13q14.1-q14.3	yes		NHL			L	Dom	T	BCL6
LCX	leukemia-associated protein with a CXXC domain	80312	10	10q21	yes		AML			L	Dom	T	MLL
LHFP	lipoma HMGIC fusion partner	10186	13	13q12	yes		lipoma			M	Dom	T	HMGA2
LIFR	leukemia inhibitory factor receptor	3977	5	5p13-p12	yes		salivary adenoma			E	Dom	T	PLAG1
LMO1	LIM domain only 1 (rhombotin 1) (RBTN1)	4004	11	11p15	yes	yes	T-ALL, neuroblastoma	neuroblastoma		L	Dom	T, A	TRD@
LMO2	LIM domain only 2 (rhombotin-like 1) (RBTN2)	4005	11	11p13	yes		T-ALL			L	Dom	T	TRD@
LPP	LIM domain containing preferred translocation partner in lipoma	4026	3	3q28	yes		lipoma, leukemia			L, M	Dom	T	HMGA2, MLL, C12orf9
LYL1	lymphoblastic leukemia derived sequence 1	4066	19	19p13.2-p13.1	yes		T-ALL			L	Dom	T	TRB@
MADH4	Homolog of Drosophila Mothers Against Decapentaplegic 4 gene	4089	18	18q21.1	yes	yes	colorectal, pancreatic, small intestine	gastrointestinal polyps	Juvenile polyposis	E	Rec	D, Mis, N, F
MAF	v-maf musculoaponeurotic fibrosarcoma oncogene homolog	4094	16	16q22-q23	yes		MM			L	Dom	T	IGH@
MAFB	v-maf musculoaponeurotic fibrosarcoma oncogene homolog B (avian)	9935	20	20q11.2-q13.1	yes		MM			L	Dom	T	IGH@
MALT1	mucosa associated lymphoid tissue lymphoma translocation gene 1	10892	18	18q21	yes		MALT			L	Dom	T	BIRC3
MAML2	mastermind-like 2 (Drosophila)	84441	11	11q22-q23	yes		salivary gland mucoepidermoid			E	Dom	T	MECT1, CRTC3
MAP2K4	mitogen-activated protein kinase kinase 4	6416	17	17p11.2	yes		pancreatic, breast, colorectal			E	Rec	D, Mis, N
MDM2	Mdm2 p53 binding protein homolog	4193	12	12q15	yes		sarcoma, glioma, colorectal, other			M, O, E, L	Dom	A
MDM4	Mdm4 p53 binding protein homolog	4194	1	1q32	yes		GBM, bladder, retinoblastoma			M	Dom	A
MDS1	myelodysplasia syndrome 1	4197	3	3q26	yes		MDS, AML			L	Dom	T	RUNX1
MDS2	myelodysplastic syndrome 2	259283	1	1p36	yes		MDS			L	Dom	T	ETV6
MECT1	mucoepidermoid translocated 1	94159	19	19p13	yes		salivary gland mucoepidermoid			E	Dom	T	MAML2
MED12	mediator complex subunit 12	9968	X	Xq13	yes		uterine leiomyoma			M	Dom	M, S		Yes	Opitz-Kaveggia Syndrome
MEN1	multiple endocrine neoplasia type 1 gene	4221	11	11q13	yes	yes	parathyroid tumors, Pancreatic neuroendocrine tumors	parathyroid adenoma, pituitary adenoma, pancreatic islet cell, carcinoid	Multiple Endocrine Neoplasia Type 1	E	Rec	D, Mis, N, F, S
MET	met proto-oncogene (hepatocyte growth factor receptor)	4233	7	7q31	yes		papillary renal, head-neck squamous cell	papillary renal	Familial Papillary Renal Cancer	E	Dom	Mis
MITF	microphthalmia-associated transcription factor	4286	3	3p14.1	yes		melanoma			E	Dom	A		yes	Waardenburg syndrome type 2, Tietz syndrome
MKL1	megakaryoblastic leukemia (translocation) 1	57591	22	22q13	yes		acute megakaryocytic leukemia			L	Dom	T	RBM15
MLF1	myeloid leukemia factor 1	4291	3	3q25.1	yes		AML			L	Dom	T	NPM1
MLH1	E.coli MutL homolog gene	4292	3	3p21.3	yes	yes	colorectal, endometrial, ovarian, CNS	colorectal, endometrial, ovarian, CNS	Hereditary non-polyposis colorectal cancer, Turcot syndrome	E, O	Rec	D, Mis, N, F, S
MLL	myeloid/lymphoid or mixed-lineage leukemia (trithorax homolog, Drosophila)	4297	11	11q23	yes		AML, ALL			L	Dom	T, O	MLL, MLLT1, MLLT2, MLLT3, MLLT4, MLLT7, MLLT10, MLLT6, ELL, EPS15, AF1Q, CREBBP, SH3GL1, FNBP1, PNUTL1, MSF, GPHN, GMPS, SSH3BP1, ARHGEF12, GAS7, FOXO3A, LAF4, LCX, SEPT6, LPP, CBFA2T1, GRAF, EP300, PICALM, HEAB
MLL2	myeloid/lymphoid or mixed-lineage leukemia 2	8085	12	12q12-q14	yes		medulloblastoma, renal			O, E	Rec	N, F, Mis
MLL3	myeloid/lymphoid or mixed-lineage leukemia 3	58508	7	7q36.1	yes		medulloblastoma			O	Rec	N
MLLT1	myeloid/lymphoid or mixed-lineage leukemia (trithorax homolog, Drosophila); translocated to, 1 (ENL)	4298	19	19p13.3	yes		AL			L	Dom	T	MLL
MLLT10	myeloid/lymphoid or mixed-lineage leukemia (trithorax homolog, Drosophila); translocated to, 10 (AF10)	8028	10	10p12	yes		AL			L	Dom	T	MLL, PICALM, CDK6
MLLT2	myeloid/lymphoid or mixed-lineage leukemia (trithorax homolog, Drosophila); translocated to, 2 (AF4)	4299	4	4q21	yes		AL			L	Dom	T	MLL
MLLT3	myeloid/lymphoid or mixed-lineage leukemia (trithorax homolog, Drosophila); translocated to, 3 (AF9)	4300	9	9p22	yes		ALL			L	Dom	T	MLL
MLLT4	myeloid/lymphoid or mixed-lineage leukemia (trithorax homolog, Drosophila); translocated to, 4 (AF6)	4301	6	6q27	yes		AL			L	Dom	T	MLL
MLLT6	myeloid/lymphoid or mixed-lineage leukemia (trithorax homolog, Drosophila); translocated to, 6 (AF17)	4302	17	17q21	yes		AL			L	Dom	T	MLL
MLLT7	myeloid/lymphoid or mixed-lineage leukemia (trithorax homolog, Drosophila); translocated to, 7 (AFX1)	4303	X	Xq13.1	yes		AL			L	Dom	T	MLL
MN1	meningioma (disrupted in balanced translocation) 1	4330	22	22q13	yes		AML, meningioma			L, O	Dom	T	ETV6
MPL	myeloproliferative leukemia virus oncogene, thrombopoietin receptor	4352	1	p34	yes	yes	MPD	MPD	Familial essential thrombocythemia	L	Dom	Mis		yes	congenital amegakaryocytic thrombocytopenia
MSF	MLL septin-like fusion	10801	17	17q25	yes		AML*			L	Dom	T	MLL
MSH2	mutS homolog 2 (E. coli)	4436	2	2p22-p21	yes	yes	colorectal, endometrial, ovarian	colorectal, endometrial, ovarian	Hereditary non-polyposis colorectal cancer	E	Rec	D, Mis, N, F, S
MSH6	mutS homolog 6 (E. coli)	2956	2	2p16	yes	yes	colorectal	colorectal, endometrial, ovarian	Hereditary non-polyposis colorectal cancer	E	Rec	Mis, N, F, S
MSI2	musashi homolog 2 (Drosophila)	124540	17	17q23.2	yes		CML			L	Dom	T	HOXA9
MSN	moesin	4478	X	Xq11.2-q12	yes		ALCL			L	Dom	T	ALK
MTCP1	mature T-cell proliferation 1	4515	X	Xq28	yes		T cell prolymphocytic leukemia			L	Dom	T	TRA@
MUC1	mucin 1, transmembrane	4582	1	1q21	yes		B-NHL			L	Dom	T	IGH@
MUTYH	mutY homolog (E. coli)	4595	1	1p34.3-1p32.1		yes		colorectal	Adenomatous polyposis coli	E	Rec	Mis
MYB	v-myb myeloblastosis viral oncogene homolog	4602	6	6q22-23	yes		adenoid cystic carcinoma			E	Dom	T	NFIB
MYC	v-myc myelocytomatosis viral oncogene homolog (avian)	4609	8	8q24.12-q24.13	yes		Burkitt lymphoma, amplified in other cancers, B-CLL			L, E	Dom	A, T	IGK@, BCL5, BCL7A , BTG1, TRA@, IGH@
MYCL1	v-myc myelocytomatosis viral oncogene homolog 1, lung carcinoma derived (avian)	4610	1	1p34.3	yes		small cell lung			E	Dom	A
MYCN	v-myc myelocytomatosis viral related oncogene, neuroblastoma derived (avian)	4613	2	2p24.1	yes		neuroblastoma			O	Dom	A
MYD88	myeloid differentiation primary response gene (88)	4615	3	3p22	yes		ABC-DLBCL			L	Dom	Mis
MYH11	myosin, heavy polypeptide 11, smooth muscle	4629	16	16p13.13-p13.12	yes		AML			L	Dom	T	CBFB
MYH9	myosin, heavy polypeptide 9, non-muscle	4627	22	22q13.1	yes		ALCL			L	Dom	T	ALK	yes	Deafness, autosomal dominant 17, Epstein syndrome, Fechtner syndrome, May-Hegglin anomaly, Sebastian syndrome
MYST4	MYST histone acetyltransferase (monocytic leukemia) 4 (MORF)	23522	10	10q22	yes		AML			L	Dom	T	CREBBP
NACA	nascent-polypeptide-associated complex alpha polypeptide	4666	12	12q23-q24.1	yes		NHL			L	Dom	T	BCL6
NBS1	Nijmegen breakage syndrome 1 (nibrin)	4683	8	8q21		yes		NHL, glioma, medulloblastoma, rhabdomyosarcoma	Nijmegen breakage syndrome	L, E, M, O	Rec	Mis, N, F
NCOA1	nuclear receptor coactivator 1	8648	2	2p23	yes		alveolar rhadomyosarcoma			M	Dom	T	PAX3
NCOA2	nuclear receptor coactivator 2 (TIF2)	10499	8	8q13.1	yes		AML, Chondrosarcoma			L	Dom	T	RUNXBP2, HEY1
NCOA4	nuclear receptor coactivator 4 - PTC3 (ELE1)	8031	10	10q11.2	yes		papillary thyroid			E	Dom	T	RET
NDRG1	N-myc downstream regulated 1	10397	8	8q24.3	yes		prostate			E	Dom	T	ERG
NF1	neurofibromatosis type 1 gene	4763	17	17q12	yes	yes	neurofibroma, glioma	neurofibroma, glioma	Neurofibromatosis type 1	O	Rec	D, Mis, N, F, S, O
NF2	neurofibromatosis type 2 gene	4771	22	22q12.2	yes	yes	meningioma, acoustic neuroma, renal	meningioma, acoustic neuroma	Neurofibromatosis type 2	O	Rec	D, Mis, N, F, S, O
NFE2L2	nuclear factor (erythroid-derived 2)-like 2 (NRF2)	4780	2	2q31	yes		NSCLC, HNSCC			E	Dom	Mis
NFIB	nuclear factor I/B	4781	9	9p24.1	yes		adenoid cystic carcinoma, lipoma			E	Dom	T	MYB, HGMA2
NFKB2	nuclear factor of kappa light polypeptide gene enhancer in B-cells 2 (p49/p100)	4791	10	10q24	yes		B-NHL			L	Dom	T	IGH@
NIN	ninein (GSK3B interacting protein)	51199	14	14q24	yes		MPD			L	Dom	T	PDGFRB
NKX2-1	NK2 homeobox 1	7080	14	14q13	yes		NSCLC			E	Dom	A
NONO	non-POU domain containing, octamer-binding	4841	X	Xq13.1	yes		papillary renal cancer			E	Dom	T	TFE3
NOTCH1	Notch homolog 1, translocation-associated (Drosophila) (TAN1)	4851	9	9q34.3	yes		T-ALL			L	Dom	T, Mis, O	TRB@
NOTCH2	Notch homolog 2	4853	1	1p13-p11	yes		marginal zone lymphoma, DLBCL			L	Dom	N, F, Mis
NPM1	nucleophosmin (nucleolar phosphoprotein B23, numatrin)	4869	5	5q35	yes		NHL, APL, AML			L	Dom	T, F	ALK, RARA, MLF1
NR4A3	nuclear receptor subfamily 4, group A, member 3 (NOR1)	8013	9	9q22	yes		extraskeletal myxoid chondrosarcoma			M	Dom	T	EWSR1
NRAS	neuroblastoma RAS viral (v-ras) oncogene homolog	4893	1	1p13.2	yes		melanoma, MM, AML, thyroid			L, E	Dom	Mis
NSD1	nuclear receptor binding SET domain protein 1	64324	5	5q35	yes		AML			L	Dom	T	NUP98	yes	Sotos Syndrome
NTRK1	neurotrophic tyrosine kinase, receptor, type 1	4914	1	1q21-q22	yes		papillary thyroid			E	Dom	T	TPM3, TPR, TFG
NTRK3	neurotrophic tyrosine kinase, receptor, type 3	4916	15	15q25	yes		congenital fibrosarcoma, Secretory breast			E, M	Dom	T	ETV6
NUMA1	nuclear mitotic apparatus protein 1	4926	11	11q13	yes		APL			L	Dom	T	RARA
NUP214	nucleoporin 214kDa (CAN)	8021	9	9q34.1	yes		AML, T-ALL			L	Dom	T	DEK, SET, ABL1
NUP98	nucleoporin 98kDa	4928	11	11p15	yes		AML			L	Dom	T	HOXA9, NSD1, WHSC1L1, DDX10, TOP1, HOXD13, PMX1, HOXA13, HOXD11, HOXA11, RAP1GDS1, HOXC11
OLIG2	oligodendrocyte lineage transcription factor 2 (BHLHB1)	10215	21	21q22.11	yes		T-ALL			L	Dom	T	TRA@
OMD	osteomodulin	4958	9	9q22.31	yes		aneurysmal bone cysts			M	Dom	T	USP6
P2RY8	purinergic receptor P2Y, G-protein coupled, 8	286530	X,Y	Xp22.3; Yp11.3	yes		B-ALL, Downs associated ALL			L	Dom	T	CRLF2
PAFAH1B2	platelet-activating factor acetylhydrolase, isoform Ib, beta subunit 30kDa	5049	11	11q23	yes		MLCLS			L	Dom	T	IGH@
PALB2	partner and localizer of BRCA2	79728	16	16p12.1		yes		Wilms tumor, medulloblastoma, AML ,breast	Fanconi anaemia N, breast cancer susceptibility	L, O, E	Rec	F, N, Mis
PAX3	paired box gene 3	5077	2	2q35	yes		alveolar rhabdomyosarcoma			M	Dom	T	FOXO1A, NCOA1	yes	Waardenburg syndrome; craniofacial-deafness-hand syndrome
PAX5	paired box gene 5 (B-cell lineage specific activator protein)	5079	9	9p13	yes		NHL, ALL, B-ALL			L	Dom	T, Mis, D, F, S	IGH@, ETV6, PML, FOXP1, ZNF521, ELN
PAX7	paired box gene 7	5081	1	1p36.2-p36.12	yes		alveolar rhabdomyosarcoma			M	Dom	T	FOXO1A
PAX8	paired box gene 8	7849	2	2q12-q14	yes		follicular thyroid			E	Dom	T	PPARG	yes	Thyroid dysgenesis
PBRM1	polybromo 1	55193	3	3p21	yes		clear cell renal carcinoma, breast			E	Rec	Mis, N, F, S, D, O
PBX1	pre-B-cell leukemia transcription factor 1	5087	1	1q23	yes		pre B-ALL, myoepithelioma			L, M	Dom	T	TCF3, EWSR1
PCM1	pericentriolar material 1 (PTC4)	5108	8	8p22-p21.3	yes		papillary thyroid, CML, MPD			E, L	Dom	T	RET, JAK2
PCSK7	proprotein convertase subtilisin/kexin type 7	9159	11	11q23.3	yes		MLCLS			L	Dom	T	IGH@
PDE4DIP	phosphodiesterase 4D interacting protein (myomegalin)	9659	1	1q12	yes		MPD			L	Dom	T	PDGFRB
PDGFB	platelet-derived growth factor beta polypeptide (simian sarcoma viral (v-sis) oncogene homolog)	5155	22	22q12.3-q13.1	yes		DFSP			M	Dom	T	COL1A1
PDGFRA	platelet-derived growth factor, alpha-receptor	5156	4	4q11-q13	yes		GIST, idiopathic hypereosinophilic syndrome			L, M, O	Dom	Mis, O, T	FIP1L1
PDGFRB	platelet-derived growth factor receptor, beta polypeptide	5159	5	5q31-q32	yes		MPD, AML, CMML, CML			L	Dom	T	ETV6, TRIP11, HIP1, RAB5EP, H4, NIN, HCMOGT-1, PDE4DIP
PER1	period homolog 1 (Drosophila)	5187	17	17p13.1-17p12	yes		AML, CMML			L	Dom	T	ETV6
PHOX2B	paired-like homeobox 2b	8929	4	4p12	yes	yes	neuroblastoma	neuroblastoma	familial neuroblastoma	O	Rec	Mis, F		yes	congenital central hypoventilation syndrome
PICALM	phosphatidylinositol binding clathrin assembly protein (CALM)	8301	11	11q14	yes		TALL, AML,			L	Dom	T	MLLT10, MLL
PIK3CA	phosphoinositide-3-kinase, catalytic, alpha polypeptide	5290	3	3q26.3	yes		colorectal, gastric, gliobastoma, breast			E, O	Dom	Mis
PIK3R1	phosphoinositide-3-kinase, regulatory subunit 1 (alpha)	5295	5	5q13.1	yes		gliobastoma, ovarian, colorectal			E, O	Rec	Mis, F, O
PIM1	pim-1 oncogene	5292	6	6p21.2	yes		NHL			L	Dom	T	BCL6
PLAG1	pleiomorphic adenoma gene 1	5324	8	8q12	yes		salivary adenoma			E	Dom	T	TCEA1, LIFR, CTNNB1, CHCHD7
PML	promyelocytic leukemia	5371	15	15q22	yes		APL, ALL			L	Dom	T	RARA, PAX5
PMS1	PMS1 postmeiotic segregation increased 1 (S. cerevisiae)	5378	2	2q31-q33		yes		colorectal, endometrial, ovarian	Hereditary non-polyposis colorectal cancer	E	Rec	Mis, N
PMS2	PMS2 postmeiotic segregation increased 2 (S. cerevisiae)	5395	7	7p22		yes		colorectal, endometrial, ovarian, medulloblastoma, glioma	Hereditary non-polyposis colorectal cancer, Turcot syndrome	E	Rec	Mis, N, F
PMX1	paired mesoderm homeo box 1	5396	1	1q24	yes		AML			L	Dom	T	NUP98
PNUTL1	peanut-like 1 (Drosophila)	5413	22	22q11.2	yes		AML			L	Dom	T	MLL
POU2AF1	POU domain, class 2, associating factor 1 (OBF1)	5450	11	11q23.1	yes		NHL			L	Dom	T	BCL6
POU5F1	POU domain, class 5, transcription factor 1	5460	6	6p21.31	yes		sarcoma			M	Dom	T	EWSR1
PPARG	peroxisome proliferative activated receptor, gamma	5468	3	3p25	yes		follicular thyroid			E	Dom	T	PAX8	yes	Insulin resistance ; lipodystrophy, familial partial L;diabetes mellitus, insulin-resistantI, with acanthosis nigricans and hypertension
PPP2R1A	protein phosphatase 2, regulatory subunit A, alpha	5518	19	19q13.41	yes		clear cell ovarian carcinoma			E	Dom?	Mis
PRCC	papillary renal cell carcinoma (translocation-associated)	5546	1	1q21.1	yes		papillary renal			E	Dom	T	TFE3
PRDM1	PR domain containing 1, with ZNF domain	639	6	6q21	yes		DLBCL			L	Rec	D, N, Mis, F, S
PRDM16	PR domain containing 16	63976	1	1p36.23-p33	yes		MDS, AML			L	Dom	T	EVI1
PRF1	perforin 1 (pore forming protein)	5551	10	10q22		yes		various leukaemia, lymphoma		L	Rec	M			Type 2 familial hemophagocytic lymphohistiocytosis
PRKAR1A	protein kinase, cAMP-dependent, regulatory, type I, alpha (tissue specific extinguisher 1)	5573	17	17q23-q24	yes	yes	papillary thyroid	myxoma, endocrine, papillary thyroid	Carney complex	E, M	Dom, Rec	T, Mis, N, F, S	RET
PRO1073	PRO1073 protein (ALPHA)	29005	11	11q31.1	yes		renal cell carcinoma (childhood epithelioid)			E	Dom	T	TFEB
PSIP2	PC4 and SFRS1 interacting protein 2 (LEDGF)	11168	9	9p22.2	yes		AML			L	Dom	T	NUP98
PTCH	Homolog of Drosophila Patched gene	5727	9	9q22.3	yes	yes	skin basal cell , medulloblastoma	skin basal cell, medulloblastoma	Nevoid Basal Cell Carcinoma Syndrome	E, M	Rec	Mis, N, F, S
PTEN	phosphatase and tensin homolog gene	5728	10	10q23.3	yes	yes	glioma, prostate, endometrial	harmartoma, glioma, prostate, endometrial	Cowden Syndrome, Bannayan-Riley-Ruvalcaba syndrome	L, E, M, O	Rec	D, Mis, N, F, S
PTPN11	protein tyrosine phosphatase, non-receptor type 11	5781	12	12q24.1	yes		JMML, AML, MDS			L	Dom	Mis		yes	Noonan Syndrome
RAB5EP	rabaptin, RAB GTPase binding effector protein 1 (RABPT5)	9135	17	17p13	yes		CMML			L	Dom	T	PDGFRB
RAD51L1	RAD51-like 1 (S. cerevisiae) (RAD51B)	5890	14	14q23-q24.2	yes		lipoma, uterine leiomyoma			M	Dom	T	HMGA2
RAF1	v-raf-1 murine leukemia viral oncogene homolog 1	5894	3	3p25	yes		pilocytic astrocytoma			M	Dom	T	SRGAP3
RALGDS	ral guanine nucleotide dissociation stimulator	5900	9	9q34.3	yes		PMBL, Hodgkin Lymphona,			L	Dom	T	CIITA
RANBP17	RAN binding protein 17	64901	5	5q34	yes		ALL			L	Dom	T	TRD@
RAP1GDS1	RAP1, GTP-GDP dissociation stimulator 1	5910	4	4q21-q25	yes		T-ALL			L	Dom	T	NUP98
RARA	retinoic acid receptor, alpha	5914	17	17q12	yes		APL			L	Dom	T	PML, ZNF145, TIF1, NUMA1, NPM1
RB1	retinoblastoma gene	5925	13	13q14	yes	yes	retinoblastoma, sarcoma, breast, small cell lung	retinoblastoma, sarcoma, breast, small cell lung	Familial retinoblastoma	L, E, M, O	Rec	D, Mis, N, F, S
RBM15	RNA binding motif protein 15	64783	1	1p13	yes		acute megakaryocytic leukemia			L	Dom	T	MKL1
RECQL4	RecQ protein-like 4	9401	8	8q24.3		yes		osteosarcoma, skin basal and sqamous cell	Rothmund-Thompson Syndrome	M	Rec	N, F, S
REL	v-rel reticuloendotheliosis viral oncogene homolog (avian)	5966	2	2p13-p12	yes		Hodgkin Lymphoma			L	Dom	A
RET	ret proto-oncogene	5979	10	10q11.2	yes	yes	medullary thyroid, papillary thyroid, pheochromocytoma	medullary thyroid, papillary thyroid, pheochromocytoma	Multiple endocrine neoplasia 2A/2B	E, O	Dom	T, Mis, N, F	H4, PRKAR1A, NCOA4, PCM1, GOLGA5, TRIM33, KTN1, TRIM27, HOOK3	yes	Hirschsprung disease
ROS1	v-ros UR2 sarcoma virus oncogene homolog 1 (avian)	6098	6	6q22	yes		glioblastoma, NSCLC			O	Dom	T	GOPC, ROS1
RPL22	ribosomal protein L22 (EAP)	6146	1	1p36.31	yes		AML, CML			L	Dom	T	RUNX1
RPN1	ribophorin I	6184	3	3q21.3-q25.2	yes		AML			L	Dom	T	EVI1
RUNDC2A	RUN domain containing 2A	84127	16	16p13.13	yes		PMBL, Hodgkin Lymphona,			L	Dom	T	CIITA
RUNX1	runt-related transcription factor 1 (AML1)	861	21	21q22.3	yes		AML, preB- ALL, T-ALL			L	Dom	T	RPL22, MDS1, EVI1, CBFA2T3, CBFA2T1, ETV6, LAF4
RUNXBP2	runt-related transcription factor binding protein 2 (MOZ/ZNF220)	7994	8	8p11	yes		AML			L	Dom	T	CREBBP, NCOA2, EP300
SBDS	Shwachman-Bodian-Diamond syndrome protein	51119	7	7q11		yes		AML, MDS	Schwachman-Diamond syndrome	L	Rec	Gene Conversion
SDH5	chromosome 11 open reading frame 79	54949	11	11q12.2		yes		paraganglioma	Familial paraganglioma	M	Rec	M
SDHB	succinate dehydrogenase complex, subunit B, iron sulfur (Ip)	6390	1	1p36.1-p35		yes		paraganglioma, pheochromocytoma	Familial paraganglioma	O	Rec	Mis, N, F
SDHC	succinate dehydrogenase complex, subunit C, integral membrane protein, 15kDa	6391	1	1q21		yes		paraganglioma, pheochromocytoma	Familial paraganglioma	O	Rec	Mis, N, F
SDHD	succinate dehydrogenase complex, subunit D, integral membrane protein	6392	11	11q23		yes		paraganglioma, pheochromocytoma	Familial paraganglioma	O	Rec	Mis, N, F, S
SEPT6	septin 6	23157	X	Xq24	yes		AML			L	Dom	T	MLL
SET	SET translocation	6418	9	9q34	yes		AML			L	Dom	T	NUP214
SETD2	SET domain containing 2	29072	3	3p21.31	yes		clear cell renal carcinoma			E	Rec	N, F, S, Mis
SF3B1	splicing factor 3b, subunit 1, 155kDa	23451	2	2q33.1	yes		myelodysplastic syndrome			L	Dom	Mis
SFPQ	splicing factor proline/glutamine rich(polypyrimidine tract binding protein associated)	6421	1	1p34.3	yes		papillary renal cell			E	Dom	T	TFE3
SFRS3	splicing factor, arginine/serine-rich 3	6428	6	6p21	yes		follicular lymphoma			L	Dom	T	BCL6
SH3GL1	SH3-domain GRB2-like 1 (EEN)	6455	19	19p13.3	yes		AL			L	Dom	T	MLL
SIL	TAL1 (SCL) interrupting locus	6491	1	1p32	yes		T-ALL			L	Dom	T	TAL1
SLC45A3	solute carrier family 45, member 3	85414	1	1q32	yes		prostate			E	Dom	T	ETV1, ETV5, ELK4, ERG
SMARCA4	SWI/SNF related, matrix associated, actin dependent regulator of chromatin, subfamily a, member 4	6597	19	19p13.2	yes		NSCLC			E	Rec	F, N, Mis
SMARCB1	SWI/SNF related, matrix associated, actin dependent regulator of chromatin, subfamily b, member 1	6598	22	22q11	yes	yes	malignant rhabdoid	malignant rhabdoid	Rhabdoid predisposition syndrome	M	Rec	D, N, F, S
SMO	smoothened homolog (Drosophila)	6608	7	7q31-q32	yes		skin basal cell			E	Dom	Mis
SOCS1	suppressor of cytokine signaling 1	8651	16	16p13.13	yes		Hodgkin Lymphoma, PMBL			L	Rec	F, O
SOX2	SRY (sex determining region Y)-box 2	6657	3	3q26.3-q27	yes		NSCLC, oesophageal squamous carcinoma			E	Dom	A		yes	MICROPHTHALMIA AND ESOPHAGEAL ATRESIA SYNDROME
SRGAP3	SLIT-ROBO Rho GTPase activating protein 3	9901	3	3p25.3	yes		pilocytic astrocytoma			M	Dom	T	RAF1
SRSF2	serine/arginine-rich splicing factor 2	6427	17	17q25	yes		MDS, CLL			L	Dom	Mis
SS18	synovial sarcoma translocation, chromosome 18	6760	18	18q11.2	yes		synovial sarcoma			M	Dom	T	SSX1, SSX2
SS18L1	synovial sarcoma translocation gene on chromosome 18-like 1	26039	20	20q13.3	yes		synovial sarcoma			M	Dom	T	SSX1
SSH3BP1	spectrin SH3 domain binding protein 1	10006	10	10p11.2	yes		AML			L	Dom	T	MLL
SSX1	synovial sarcoma, X breakpoint 1	6756	X	Xp11.23-p11.22	yes		synovial sarcoma			M	Dom	T	SS18
SSX2	synovial sarcoma, X breakpoint 2	6757	X	Xp11.23-p11.22	yes		synovial sarcoma			M	Dom	T	SS18
SSX4	synovial sarcoma, X breakpoint 4	6759	X	Xp11.23	yes		synovial sarcoma			M	Dom	T	SS18
STK11	serine/threonine kinase 11 gene (LKB1)	6794	19	19p13.3	yes	yes	NSCLC, pancreatic	jejunal harmartoma, ovarian, testicular, pancreatic	Peutz-Jeghers syndrome	E, M, O	Rec	D, Mis, N, F, S
STL	Six-twelve leukemia gene	7955	6	6q23	yes		B-ALL			L	Dom	T	ETV6
SUFU	suppressor of fused homolog (Drosophila)	51684	10	10q24.32	yes	yes	medulloblastoma	medulloblastoma	Medulloblastoma predisposition	O	Rec	D, F, S
SUZ12	suppressor of zeste 12 homolog (Drosophila)	23512	17	17q11.2	yes		endometrial stromal tumours			M	Dom	T	JAZF1
SYK	spleen tyrosine kinase	6850	9	9q22	yes		MDS, peripheral T-cell lymphoma			L	Dom	T	ETV6, ITK
TAF15	TAF15 RNA polymerase II, TATA box binding protein (TBP)-associated factor, 68kDa	8148	17	17q11.1-q11.2	yes		extraskeletal myxoid chondrosarcomas, ALL			L, M	Dom	T	TEC, CHN1, ZNF384
TAL1	T-cell acute lymphocytic leukemia 1 (SCL)	6886	1	1p32	yes		lymphoblastic leukemia/biphasic			L	Dom	T	TRD@, SIL
TAL2	T-cell acute lymphocytic leukemia 2	6887	9	9q31	yes		T-ALL			L	Dom	T	TRB@
TCEA1	transcription elongation factor A (SII), 1	6917	8	8q11.2	yes		salivary adenoma			E	Dom	T	PLAG1
TCF1	transcription factor 1, hepatic (HNF1)	6927	12	12q24.2	yes	yes	hepatic adenoma, hepatocellular ca	hepatic adenoma, hepatocellular ca	Familial Hepatic Adenoma	E	Rec	Mis, F		yes	Maturity-onset diabetes of the young, TYPE III
TCF12	transcription factor 12 (HTF4, helix-loop-helix transcription factors 4)	6938	15	15q21	yes		extraskeletal myxoid chondrosarcoma			M	Dom	T	TEC
TCF3	transcription factor 3 (E2A immunoglobulin enhancer binding factors E12/E47)	6929	19	19p13.3	yes		pre B-ALL			L	Dom	T	PBX1, HLF, TFPT
TCF7L2	transcription factor 7-like 2	6934	10	10q25.3	yes		colorectal			E	Dom	T	VTI1A
TCL1A	T-cell leukemia/lymphoma 1A	8115	14	14q32.1	yes		T-CLL			L	Dom	T	TRA@
TCL6	T-cell leukemia/lymphoma 6	27004	14	14q32.1	yes		T-ALL			L	Dom	T	TRA@
TET2	tet oncogene family member 2	54790	4	4q24	yes		MDS			L	Rec	Mis N, F
TFE3	transcription factor binding to IGHM enhancer 3	7030	X	Xp11.22	yes		papillary renal, alveolar soft part sarcoma, renal			E	Dom	T	SFPQ, ASPSCR1, PRCC, NONO, CLTC
TFEB	transcription factor EB	7942	6	6p21	yes		renal (childhood epithelioid)			E,M	Dom	T	ALPHA
TFG	TRK-fused gene	10342	3	3q11-q12	yes		papillary thyroid, ALCL, NSCLC			E, L	Dom	T	NTRK1, ALK
TFPT	TCF3 (E2A) fusion partner (in childhood Leukemia)	29844	19	19q13	yes		pre-B ALL			L	Dom	T	TCF3
TFRC	transferrin receptor (p90, CD71)	7037	3	3q29	yes		NHL			L	Dom	T	BCL6
THRAP3	thyroid hormone receptor associated protein 3 (TRAP150)	9967	1	1p34.3	yes		aneurysmal bone cysts			M	Dom	T	USP6
TIF1	transcriptional intermediary factor 1 (PTC6,TIF1A)	8805	7	7q32-q34	yes		APL			L	Dom	T	RARA
TLX1	T-cell leukemia, homeobox 1 (HOX11)	3195	10	10q24	yes		T-ALL			L	Dom	T	TRB@, TRD@
TLX3	T-cell leukemia, homeobox 3 (HOX11L2)	30012	5	5q35.1	yes		T-ALL			L	Dom	T	BCL11B
TMPRSS2	transmembrane protease, serine 2	7113	21	21q22.3	yes		prostate			E	Dom	T	ERG, ETV1, ETV4, ETV5
TNFAIP3	tumor necrosis factor, alpha-induced protein 3	7128	6	6q23	yes		marginal zone B-cell lymphomas, Hodgkin's lymphoma, primary mediastinal B cell lymphoma			L	Rec	D, N, F
TNFRSF14	tumor necrosis factor receptor superfamily, member 14 (herpesvirus entry mediator)	8764	1	1p36.32	yes		follicular lymphoma			L	Rec	Mis, N, F
TNFRSF17	tumor necrosis factor receptor superfamily, member 17	608	16	16p13.1	yes		intestinal T-cell lymphoma			L	Dom	T	IL2
TNFRSF6	tumor necrosis factor receptor superfamily, member 6 (FAS)	355	10	10q24.1	yes		TGCT, nasal NK/T lymphoma, skin squamous cell ca -burn scar-related			L, E, O	Rec	Mis		yes	Autoimmune lymphoproliferative syndrome
TOP1	topoisomerase (DNA) I	7150	20	20q12-q13.1	yes		AML*			L	Dom	T	NUP98
TP53	tumor protein p53	7157	17	17p13	yes	yes	breast, colorectal, lung, sarcoma, adrenocortical, glioma, multiple other tumour types	breast, sarcoma, adrenocortical carcinoma, glioma, multiple other tumour types	Li-Fraumeni syndrome	L, E, M, O	Rec	Mis, N, F
TPM3	tropomyosin 3	7170	1	1q22-q23	yes		papillary thyroid, ALCL			E, L	Dom	T	NTRK1, ALK
TPM4	tropomyosin 4	7171	19	19p13.1	yes		ALCL			L	Dom	T	ALK
TPR	translocated promoter region	7175	1	1q25	yes		papillary thyroid			E	Dom	T	NTRK1
TRA@	T cell receptor alpha locus	6955	14	14q11.2	yes		T-ALL			L	Dom	T	ATL,OLIG2, MYC, TCL1A, TCL6, MTCP1, TCL6
TRB@	T cell receptor beta locus	6957	7	7q35	yes		T-ALL			L	Dom	T	HOX11, LCK, NOTCH1, TAL2, LYL1
TRD@	T cell receptor delta locus	6964	14	14q11	yes		T-cell leukemia			L	Dom	T	TAL1, HOX11, TLX1, LMO1, LMO2, RANBP17
TRIM27	tripartite motif-containing 27	5987	6	6p22	yes		papillary thyroid			E	Dom	T	RET
TRIM33	tripartite motif-containing 33 (PTC7,TIF1G)	51592	1	1p13	yes		papillary thyroid			E	Dom	T	RET
TRIP11	thyroid hormone receptor interactor 11	9321	14	14q31-q32	yes		AML			L	Dom	T	PDGFRB
TSC1	tuberous sclerosis 1 gene	7248	9	9q34		yes		hamartoma, renal cell	Tuberous sclerosis 1	E, O	Rec	D, Mis, N, F, S
TSC2	tuberous sclerosis 2 gene	7249	16	16p13.3		yes		hamartoma, renal cell	Tuberous sclerosis 2	E, O	Rec	D, Mis, N, F, S
TSHR	thyroid stimulating hormone receptor	7253	14	14q31	yes	yes	toxic thyroid adenoma	thyroid adenoma		E	Dom	Mis		yes	Hereditary nonautoimmune hyperthyroidism; subclinical hypothyroidism
TTL	tubulin tyrosine ligase	150465	2	2q13	yes		ALL			L	Dom	T	ETV6
U2AF1	U2 small nuclear RNA auxiliary factor 1	7307	21	21q22.3	yes		CLL, MDS			L	Dom	Mis
USP6	ubiquitin specific peptidase 6 (Tre-2 oncogene)	9098	17	17p13	yes		aneurysmal bone cysts			M	Dom	T	COL1A1, CDH11, ZNF9, OMD
VHL	von Hippel-Lindau syndrome gene	7428	3	3p25	yes	yes	renal, hemangioma, pheochromocytoma	renal, hemangioma, pheochromocytoma	von Hippel-Lindau syndrome	E, M, O	Rec	D, Mis, N, F, S
VTI1A	vesicle transport through interaction with t-SNAREs homolog 1A	143187	10	10q25.2	yes		colorectal			E	Dom	T	TCF7L2
WAS	Wiskott-Aldrich syndrome	7454	X	Xp11.23-p11.22				lymphoma	Wiskott-Aldrich syndrome	L	X-linked recessive	Mis, N, F, S
WHSC1	Wolf-Hirschhorn syndrome candidate 1(MMSET)	7468	4	4p16.3	yes		MM			L	Dom	T	IGH@
WHSC1L1	Wolf-Hirschhorn syndrome candidate 1-like 1 (NSD3)	54904	8	8p12	yes		AML			L	Dom	T	NUP98
WIF1	WNT inhibitory factor 1	11197	12	12q14.3	yes		pleomorphic salivary gland adenoma			E	Dom	T	HMGA2
WRN	Werner syndrome (RECQL2)	7486	8	8p12-p11.2		yes		osteosarcoma, meningioma, others	Werner Syndrome	L, E, M, O	Rec	Mis, N, F, S
WT1	Wilms tumour 1 gene	7490	11	11p13	yes	yes	Wilms, desmoplastic small round cell tumor	Wilms	Denys-Drash syndrome, Frasier syndrome, Familial Wilms tumor	O	Rec	D, Mis, N, F, S	EWSR1
WTX	family with sequence similarity 123B (FAM123B)	139285	X	Xq11.1	yes		Wilms tumour			O	Rec	F, D, N, Mis
XPA	xeroderma pigmentosum, complementation group A	7507	9	9q22.3		yes		skin basal cell, skin squamous cell, melanoma	Xeroderma pigmentosum (A)	E	Rec	Mis, N, F, S
XPC	xeroderma pigmentosum, complementation group C	7508	3	3p25		yes		skin basal cell, skin squamous cell, melanoma	Xeroderma pigmentosum (C)	E	Rec	Mis, N, F, S
XPO1	exportin 1 (CRM1 homolog, yeast)	7514	2	2p15	yes		CLL			L	Dom	Mis
YWHAE	tyrosine 3-monooxygenase/tryptophan 5-monooxygenase activation protein, epsilon polypeptide (14-3-3 epsilon)	7531	17	17p13.3	yes		edometrial stromal sarcoma			M	Dom	T	FAM22a, FAM22B	yes	Miller-Dieker lissencephaly syndrome
ZNF145	zinc finger protein 145 (PLZF)	7704	11	11q23.1	yes		APL			L	Dom	T	RARA
ZNF198	zinc finger protein 198	7750	13	13q11-q12	yes		MPD, NHL			L	Dom	T	FGFR1
ZNF278	zinc finger protein 278 (ZSG)	23598	22	22q12-q14	yes		Ewing sarcoma			M	Dom	T	EWSR1
ZNF331	zinc finger protein 331	55422	19	19q13.3-q13.4	yes		follicular thyroid adenoma			E	Dom	T	?
ZNF384	zinc finger protein 384 (CIZ/NMP4)	171017	12	12p13	yes		ALL			L	Dom	T	EWSR1, TAF15
ZNF521	zinc finger protein 521	25925	18	18q11.2	yes		ALL			L	Dom	T	PAX5
ZNF9	zinc finger protein 9 (a cellular retroviral nucleic acid binding protein)	7555	3	3q21	yes		aneurysmal bone cysts			M	Dom	T	USP6
ZRSR2	zinc finger (CCCH type), RNA-binding motif and serine/arginine rich 2	8233	X	Xp22.1	yes		MDS, CLL			L	Rec	F, S, Mis

## Sheet: AGING
Human homologue(s)	entrez id		Build 15 of GenAge
ADCY5	111
ARHGAP1	392
ARNTL	406
ATM	472
ATR	545
BAX	581
BRCA1	672
BUB1B	701
BUB3	9184
CASP2	835
CAV1	857
CDKN1A	1026
CEBPA	1050
CEBPB	1051
CHEK2	11200
COQ7	10229
EFEMP1	2202
ERCC2	2068
ERCC4	2072
FGF23	8074
FOXM1	2305
GH1	2688
GHR	2690
GHRHR	2692
GPX4	2879
HELLS	3070
HTR1B	3351
IGF1	3479
IGF1R	3480
INSR	3643
IRS1	3667
IRS2	8660
KL	9365
LMNA	4000
MCM2	4171
MGAT5	4249
MSH2	4436
MSRA	4482
NEIL1	79661
NOS3	4846
PAPPA	5069
PAWR	5074
PCK1	5105
POU1F1	5449
PLAU	5328
POLG	5428
PPM1D	8493
PRDX1	5052
PROP1	5626
RAE1	8480
SHC1	6464
SIRT6	51548
SLC25A4	291
STUB1	10273
SURF1	6834
TERF2	7014
TERT	7015
TOP3B	8940
TP53	7157
TP73L	8626
TXN	7295
UCP2	7351
XRCC5	7520
XRCC6	2547
ZMPSTE24	10269

## Sheet: CENSUS uniprot
EntrezGene ID	UniProt ID		Unique IDs
25	Q59FK4		A0JLT9
25	P00519		A0N775
27	P42684		A0PJU7
2181	O95573		A1L467
2181	B3KMA6		A1L491
57082	Q8NG31		A1L4G3
10962	Q6FGF7		A2RUU9
10962	Q13015		A3KME0
51517	Q9NZQ3		A4D1G0
27125	Q9UHB7		A4D1K5
10142	Q99996		A5PKX7
10142	Q5GIA7		A5X2G7
10142	Q6PJH3		A5YRU5
207	B3KVH4		A5YRU7
207	P31749		A5YRV0
207	B0LPE5		A5YRV2
208	B4DG79		A6H8Y6
208	P31751		A6NF12
217	B4DW54		A6NGV1
217	P05091		A6NI00
217	E7EUE5		A6ZID6
238	Q9UM73		A6ZID7
238	B6D4Y2		A6ZID9
324	Q4LE70		A6ZIE0
324	P25054		A6ZIE4
324	B7Z2B6		A6ZIE6
23365	Q9NZN5		A7E2E1
23365	B4E2K6		A8DPS6
399	Q15669		A8DPS7
399	Q6ICP4		A8K1A9
8289	O14497		A8K1U7
196528	Q68CP9		A8K1U9
405	P27540		A8K1Z4
405	A8K6P0		A8K2U9
405	B0AZM1		A8K4G2
79058	Q9BZE9		A8K5V0
171023	Q498B9		A8K639
171023	Q8IXJ9		A8K6P0
466	P18846		A8K6Q8
471	P31939		A8K7B7
472	Q13315		A8K7V4
546	P46100		A8K840
8314	Q92560		A8K8W5
8915	O95999		A8K9D9
8915	Q5VUF1		A8K9S7
53335	Q9H165		A8KAC2
53335	D9YZV9		A8MYD4
53335	D6W5D9		B0AZM1
64919	Q9C0K0		B0LPE5
596	P10415		B0QYK1
596	C9JHD5		B1A8Z4
602	P20749		B1A8Z5
604	B5B0A5		B1A8Z6
604	P41182		B1A8Z7
604	B8PSA7		B1ANA8
605	Q4VC05		B1ANK7
607	O00512		B1AVQ5
54880	Q6W2J9		B1AVR0
613	P11274		B2R4P8
201163	Q8NFG4		B2R4R0
330	Q13489		B2R5T5
641	P54132		B2R5V0
657	P36894		B2R6F3
673	P15056		B2R6I9
672	Q3LRJ6		B2RB13
672	P38398		B2RD48
672	Q1RMC1		B2REB8
672	Q6IN79		B2RUT2
672	E9PFZ0		B3KMA6
675	P51587		B3KN30
8019	Q15059		B3KNU0
23476	Q4G0X8		B3KNW7
23476	O60885		B3KQ22
83990	Q9BX63		B3KRT8
694	P62324		B3KSA5
694	Q6IBC8		B3KSS7
701	O60566		B3KT19
256646	Q86Y26		B3KV70
116028	Q96E14		B3KVH4
124583	Q8WVQ1		B3KWD0
84433	Q9BXL7		B3KX62
84433	Q8TES3		B4DFW3
833	B4DPV7		B4DG79
833	P49589		B4DI13
833	Q5HYE4		B4DIA5
862	B2R6I9		B4DIP3
862	Q7Z4J5		B4DIR3
862	Q06455		B4DJH2
862	B7Z4P4		B4DJL2
862	E7EPN4		B4DLC2
863	O75081		B4DN37
865	Q13951		B4DN83
867	P22681		B4DNC7
868	A8K9S7		B4DPV7
868	B3KSS7		B4DQ11
868	Q13191		B4DQ58
23624	Q9ULV8		B4DQ60
57820	Q9NPC3		B4DQ72
595	Q6FI00		B4DRA1
595	P24385		B4DRJ8
894	P30279		B4DSC1
896	E9PAS4		B4DTC6
896	B3KQ22		B4DTD8
896	P30281		B4DTM3
896	E9PB36		B4DTU1
898	P24864		B4DV19
80380	Q9BQ51		B4DVX5
29126	Q9NZQ7		B4DW07
972	P04233		B4DW27
973	P11912		B4DW54
973	A0N775		B4E1C1
974	P40259		B4E260
999	P12830		B4E2A4
999	A8K1U7		B4E2K6
1009	P55287		B4E338
51755	Q9NYV4		B4E3I2
1019	P11802		B4E3I7
1021	Q00534		B4E3W2
1021	A4D1G0		B5B0A5
1029	P42771		B6D4Y2
1029	Q8N726		B6ECB3
1029	A5X2G7		B6VEX3
1029	G3XAG3		B6VEX4
1031	P42773		B6VEX5
1031	Q6ICV4		B7Z240
1045	Q99626		B7Z2B6
1050	P49715		B7Z2C9
11064	Q7Z7A1		B7Z4C2
79145	E9PBH3		B7Z4P4
79145	Q9BUK0		B7Z618
11200	O96017		B7Z897
26511	Q9UKJ5		B7Z8W0
1123	B4DV19		B7Z9P2
1123	P15882		B7ZLW0
23152	Q96RK0		B8PSA7
4261	P33076		B8Y636
4261	Q66X48		B9X074
1213	Q00610		C6ZRJ7
8218	P53675		C6ZRJ8
57007	P25106		C6ZRJ9
1277	P02452		C6ZRK0
1316	Q99612		C6ZRK1
1316	F5H3M5		C6ZRK2
1316	D3GC14		C6ZRK5
1345	P09669		C7FEN9
1385	P16220		C9JHD5
1385	Q53X93		C9JLE3
1385	Q5U0J5		C9JU51
90993	Q96BA8		D0E2W4
64764	Q70SY1		D2IYK3
1387	Q92793		D2JYH7
1387	Q4LE28		D2KUA6
64109	Q5G7M1		D3GC14
64109	Q9HC73		D3K197
64109	D0E2W4		D6W5D9
64784	Q6UUV7		D9YZV9
64784	Q8TEF4		E0AD28
1499	P35222		E5KP25
1540	Q9NQC7		E5KP26
8030	Q16204		E5KP27
8030	Q05CP8		E5KP28
1616	B4E1C1		E7EPN4
1616	Q9UER7		E7ES17
1616	Q53F85		E7EUE5
1643	Q92466		E7EVZ4
1649	P35638		E7EX19
1649	Q53YD1		E9PAS4
1649	F8VS99		E9PAV7
1662	Q13206		E9PB36
1655	P17844		E9PBH3
1656	P26196		E9PBM3
7913	B4DN37		E9PBR7
7913	P35659		E9PCH3
23405	Q9UPY3		E9PCU2
23405	E0AD28		E9PDR7
1788	Q8WVA9		E9PEB8
1788	Q9Y6K1		E9PEJ5
1788	E9PEB8		E9PFD3
22947	F5GZ66		E9PFN0
1879	Q9UH73		E9PFV9
1956	P00533		E9PFZ0
1974	Q14240		E9PGD1
2000	Q99607		E9PGJ7
2005	P28324		E9PH06
2005	Q8IXL1		E9PH69
23085	Q8IUD2		E9PHB1
8178	P55199		E9PI07
2006	B3KRT8		E9PLP3
2006	P15502		E9PLZ5
27436	Q9HC35		E9PMK7
27436	A6H8Y6		E9PN05
2033	Q09472		E9PNA4
2033	Q7Z6C1		E9PNL6
2060	P42566		E9PP08
2060	B7Z240		E9PQG7
2064	P04626		E9PRS2
2068	P18074		F1D8N9
2068	Q7KZU6		F5GXR2
2071	P19447		F5GYU5
2072	Q92889		F5GYZ3
2073	P28715		F5GZ66
2078	B4DN83		F5H3M5
2078	P11308		F5H3T1
2078	B4DVX5		F5H401
2115	P50549		F5H4U9
2115	B7Z9P2		F6KD01
2115	F5GXR2		F8VPG7
2115	Q59GA7		F8VS99
2115	B7Z618		F8VU71
2115	E9PHB1		F8W742
2115	B7Z2C9		F8W7T5
2118	P43268		F8WES1
2119	P41161		G3V183
2120	P41212		G3V1R0
2122	Q03112		G3V2A9
2122	Q13465		G3XAD6
2122	C7FEN9		G3XAG3
2130	B0QYK1		G3XAG8
2130	Q01844		G5E9C1
2130	Q9BWA2		G5E9P9
2130	Q96FE8		G5E9V1
2130	Q96MN4		G5E9V8
2130	Q96MX4		O00255
2131	Q16394		O00291
2132	Q93063		O00512
2132	C9JU51		O00712
2146	Q15910		O14497
23305	B2RB13		O14521
23305	Q9UKU0		O14686
23305	B4DFW3		O14980
728118	Q8IVF1		O15151
54855	Q5VWP2		O15164
2175	Q86U55		O15287
2175	O15360		O15315
2176	Q00597		O15360
2176	B4E3W2		O15393
2177	Q9BXW9		O15524
2178	Q9HB96		O15534
2188	Q9NPI8		O15550
2188	A3KME0		O43248
2189	O15287		O43295
2189	Q53XM5		O43524
80204	Q86XK2		O43711
80204	A1L491		O60224
55294	Q969H0		O60566
2213	P31994		O60674
54738	Q99581		O60861
2260	P11362		O60885
11116	O95684		O60934
2263	P21802		O75030
2261	Q0IJ44		O75081
2261	P22607		O75177
2271	P07954		O75444
2271	B1ANK7		O75475
2272	A8K1A9		O75533
2272	P49789		O75626
2272	Q45QG9		O75874
81608	B4DIR3		O94761
81608	Q6UN15		O95467
81608	G3XAD6		O95573
2313	Q01543		O95633
2313	B4DTC6		O95684
2313	G3V183		O95999
2322	P36888		O96017
23048	Q96RU3		O96028
668	Q53ZD3		P00519
668	P58012		P00533
2308	Q12778		P01106
2309	O43524		P01111
27086	Q8NAN6		P01112
27086	Q9BSG9		P01116
27086	Q8N2P0		P01127
27086	Q8TEA2		P02452
27086	E9PFD3		P02786
27086	Q9H334		P04049
27086	G5E9V8		P04198
27086	Q548T7		P04233
27086	B3KV70		P04626
10272	O95633		P04629
8880	Q96AE4		P04637
2521	P35637		P04843
2521	Q6IBQ5		P05091
2521	Q13344		P05412
2531	Q06136		P06239
8522	A8KAC2		P06400
8522	O60861		P06748
2623	P15976		P06753
2624	P23769		P07900
2625	P23771		P07949
8833	P49915		P07954
8833	A8K639		P08238
2767	P29992		P08581
2776	P50148		P08922
2778	P63092		P09619
2778	P84996		P09669
2778	O95467		P0C1Z6
2778	A6NI00		P10242
2778	Q5JWF2		P10276
9950	Q8TBA6		P10415
57120	Q9HD26		P10644
2719	Q2L882		P10721
2719	C9JLE3		P11274
2719	Q53H15		P11308
2719	P51654		P11309
2719	G3V1R0		P11362
2719	Q2L880		P11387
2719	B4DTD8		P11802
10243	Q9NQX3		P11912
23092	Q9UNA1		P12270
92521	B4DW07		P12524
92521	Q5M775		P12830
92521	B4E2A4		P12980
10978	Q92989		P13796
9709	E9PGD1		P14222
9709	Q15011		P14373
23462	Q9Y5J3		P15056
3092	O00291		P15502
3092	B4E3I7		P15882
3092	E7ES17		P15923
8294	P62805		P15941
8294	B2R4R0		P15976
3131	Q16534		P16220
3131	Q6FHS9		P16234
3110	P50219		P16473
3110	F5H401		P17096
3159	P17096		P17542
3159	Q5T6U8		P17844
8091	Q1M182		P18074
8091	P52926		P18846
3181	P22626		P19447
84376	Q86VS8		P19484
3207	P31270		P19532
3209	P31271		P19544
3209	Q6DI00		P20151
3205	P31269		P20749
3227	O43248		P20823
3229	P31276		P21359
3237	P31277		P21580
3239	P35453		P21802
3265	P01112		P21912
3320	P07900		P22607
3320	Q86SX1		P22626
3326	P08238		P22681
3417	Q6FHQ6		P23025
3417	O75874		P23193
3418	P48735		P23246
10320	Q13422		P23458
3558	Q0GK43		P23759
3558	P60568		P23760
50615	Q9HBE5		P23769
3572	P40189		P23771
3572	Q5FC04		P24385
3572	Q17RA0		P24864
3662	Q15306		P25054
83417	Q96PJ5		P25106
3702	Q08881		P25445
3716	P23458		P25791
3717	O60674		P25800
3718	P52333		P26038
221895	Q86VZ6		P26196
3725	P05412		P27540
5927	P29375		P27986
8242	F5H3T1		P28324
8242	B4E3I2		P28715
8242	P41229		P29375
7403	Q59HG3		P29590
7403	O15550		P29992
3791	P35968		P30153
57670	Q9HCM3		P30279
3815	P10721		P30281
3817	P20151		P31269
3817	Q6T775		P31270
3845	P01116		P31271
3895	Q5GGW3		P31276
3895	Q86UP2		P31277
3895	Q17RZ5		P31314
3899	P51826		P31749
3899	Q8NAP7		P31751
3927	Q14847		P31939
3932	P06239		P31994
3936	P13796		P33076
80312	Q8NFU7		P35125
10186	Q9Y693		P35222
3977	P42702		P35240
3977	A8K1Z4		P35268
4004	P25800		P35453
4005	P25791		P35579
4026	Q93052		P35637
4026	B7ZLW0		P35638
4026	B7Z8W0		P35658
4066	P12980		P35659
4089	Q13485		P35749
4094	O75444		P35968
9935	Q9Y5Q3		P36888
10892	Q9UDY8		P36894
84441	Q8IZL2		P37231
6416	P45985		P38398
4193	Q00987		P40189
4194	Q2M2Y2		P40238
4194	Q59FS6		P40259
4194	O15151		P40337
4194	Q32SL2		P40424
9968	Q93074		P40692
4221	O00255		P41161
4221	Q9GZQ5		P41182
4233	A1L467		P41212
4233	P08581		P41229
4286	E9PFN0		P42336
4286	Q8WYR3		P42566
4286	B4DJL2		P42568
4286	O75030		P42684
4286	D3K197		P42702
4286	B4DNC7		P42768
57591	Q969V6		P42771
4291	Q2TLE5		P42773
4291	Q2TLE3		P43246
4291	Q8N8F8		P43268
4291	Q2TLE4		P43405
4291	P58340		P43699
4291	Q5HYH4		P45985
4291	Q96MH1		P46100
4291	B2RD48		P46531
4292	Q5GJ64		P48431
4292	B4DI13		P48735
4292	E9PCU2		P49589
4292	P40692		P49715
4292	B4DQ11		P49789
4297	Q03164		P49815
4297	E9PQG7		P49915
8085	O14686		P50148
8085	Q6PIA1		P50219
8085	Q59FG6		P50549
58508	Q8NEZ4		P51532
4298	Q03111		P51587
8028	Q59EQ6		P51654
8028	Q6N002		P51825
8028	Q66K63		P51826
8028	P55197		P52306
8028	B1ANA8		P52333
8028	Q5VX90		P52701
4299	Q14C88		P52926
4299	E9PBM3		P52948
4299	P51825		P53675
4299	B4DTU1		P54132
4300	Q6MZE2		P54277
4300	P42568		P54278
4300	Q8IVB0		P54821
4301	P55196		P55196
4302	P55198		P55197
4303	P98177		P55198
4330	Q10571		P55199
4352	P40238		P55287
10801	Q9UHD8		P56278
4436	P43246		P56279
2956	Q3SWU9		P58012
2956	P52701		P58340
124540	Q96DH6		P60484
4478	P26038		P60568
4515	P56278		P62258
4582	Q7Z550		P62324
4582	A5YRV0		P62633
4582	A6ZID7		P62805
4582	A6ZIE0		P63092
4582	Q7Z538		P67936
4582	P15941		P68402
4582	Q0VAP5		P84103
4582	A6ZID6		P84996
4582	B6ECB3		P98177
4582	A6ZIE4		Q00534
4582	B1AVQ5		Q00597
4582	A5YRV2		Q00610
4582	Q0VAP6		Q00653
4582	A6ZID9		Q00987
4582	A6ZIE6		Q01081
4582	A5YRU7		Q01105
4582	A5YRU5		Q01130
4582	B1AVR0		Q01196
4582	Q7Z551		Q01543
4595	E5KP25		Q01831
4595	Q9UIF7		Q01844
4595	E5KP26		Q01860
4595	E5KP28		Q02223
4595	E5KP27		Q02548
4602	E9PNA4		Q03111
4602	Q708E9		Q03112
4602	E9PI07		Q03164
4602	P10242		Q04721
4602	E9PRS2		Q04864
4602	Q14025		Q05516
4602	E9PLZ5		Q05BK6
4602	E9PNL6		Q05CP8
4609	P01106		Q06124
4610	B4DJH2		Q06136
4610	P12524		Q06455
4613	P04198		Q06710
4613	Q53XS5		Q08881
4615	Q99836		Q09472
4615	B4DQ72		Q0GK43
4615	B4DQ60		Q0IJ44
4629	D2JYH7		Q0VAP5
4629	P35749		Q0VAP6
4629	Q3MNF1		Q10571
4629	Q3MNF0		Q12778
4629	Q3MIV8		Q12824
4627	Q60FE2		Q12967
4627	P35579		Q13015
23522	Q8WYB5		Q13191
4666	B2R4P8		Q13206
4666	Q13765		Q13315
4666	F8VU71		Q13344
4683	O60934		Q13422
8648	Q15788		Q13465
10499	Q15596		Q13485
8031	B4E260		Q13489
8031	A8K8W5		Q13492
8031	Q13772		Q13516
8031	B2R5V0		Q13635
8031	E9PAV7		Q13765
8031	Q96E88		Q13772
10397	Q92597		Q13951
4763	P21359		Q14025
4763	Q14931		Q14141
4771	P35240		Q14191
4780	B4E338		Q14240
4780	Q16236		Q14847
4780	E9PGJ7		Q14931
4781	Q5VW29		Q14980
4781	O00712		Q14C88
4781	Q6ZNF9		Q15011
4781	Q5VW28		Q15022
4791	A8K9D9		Q15059
4791	Q00653		Q15154
51199	Q5BKU3		Q15233
51199	Q8N4C6		Q15276
51199	Q5XUU0		Q15306
7080	P43699		Q15354
4841	Q15233		Q15468
4841	B7Z4C2		Q15532
4841	F5GYZ3		Q15596
4851	P46531		Q15643
4853	Q9UFD5		Q15669
4853	Q04721		Q15696
4853	Q6IQ50		Q15788
4869	Q9BYG9		Q15831
4869	P06748		Q15910
8013	Q92570		Q16204
4893	P01111		Q16236
4893	Q5U091		Q16288
64324	Q96L73		Q16384
64324	Q96MN8		Q16385
4914	P04629		Q16394
4914	A6NF12		Q16534
4916	Q16288		Q16549
4916	Q96CY4		Q16559
4926	Q4LE64		Q16633
4926	Q14980		Q17RA0
4926	Q3SYK8		Q17RZ5
8021	P35658		Q17S11
4928	P52948		Q1M182
10215	Q13516		Q1RMC1
4958	Q99983		Q2L880
286530	Q86VZ1		Q2L882
5049	A8DPS6		Q2M2Y2
5049	E9PEJ5		Q2PJS5
5049	A8DPS7		Q2TLE3
5049	P68402		Q2TLE4
5049	Q6IBR6		Q2TLE5
5049	E9PLP3		Q32NF0
79728	Q86YC2		Q32SL2
5077	G5E9C1		Q3LRJ6
5077	P23760		Q3MIV8
5077	Q494Z4		Q3MNF0
5077	Q494Z3		Q3MNF1
5079	Q5SFM2		Q3SWU9
5079	Q02548		Q3SYK8
5081	Q2PJS5		Q45QG9
5081	P23759		Q494Z3
5081	E9PFV9		Q494Z4
7849	Q06710		Q498B9
55193	Q86U86		Q499L7
5087	A8K5V0		Q4G0X8
5087	B4DSC1		Q4JGY0
5087	F5H4U9		Q4JGY1
5087	Q53YC7		Q4JHT5
5087	P40424		Q4LE28
5108	Q15154		Q4LE54
5108	A2RUU9		Q4LE64
9159	Q16549		Q4LE70
9659	Q5VU43		Q4QQI8
5155	G3XAG8		Q4VAL4
5155	P01127		Q4VAX0
5155	Q15354		Q4VC05
5156	P16234		Q53F85
5159	Q59F04		Q53FN0
5159	P09619		Q53GA5
5187	O15534		Q53H15
8929	Q99453		Q53X93
8301	E9PN05		Q53XM5
8301	Q13492		Q53XS5
8301	B4DTM3		Q53YC7
8301	F8VPG7		Q53YD1
8301	Q4LE54		Q53ZD3
5290	P42336		Q541S4
5295	P27986		Q546R4
5295	B3KT19		Q548C9
5295	E7EX19		Q548T7
5292	P11309		Q59EQ6
5324	Q6DJT9		Q59F04
5324	B4DLC2		Q59F09
5371	P29590		Q59FG5
5371	E9PBR7		Q59FG6
5378	P54277		Q59FK4
5378	Q4VAL4		Q59FS6
5378	Q5FBZ3		Q59GA7
5378	Q5FBZ8		Q59HG3
5395	P54278		Q5BKU3
5396	P54821		Q5FBZ3
5413	Q99719		Q5FBZ8
5450	Q16633		Q5FC04
5460	D2IYK3		Q5G7M1
5460	Q01860		Q5GGW3
5468	P37231		Q5GIA7
5468	D2KUA6		Q5GJ64
5518	A8K7B7		Q5HYE4
5518	P30153		Q5HYH4
5546	Q92733		Q5JTC6
5546	Q96FT4		Q5JWF2
639	Q86WM7		Q5M775
639	B4DW27		Q5SFM2
639	O75626		Q5T2R9
63976	Q9HAZ2		Q5T6U8
5551	P14222		Q5T9P3
5573	P10644		Q5U091
5573	B2R5T5		Q5U0E9
11168	O75475		Q5U0J5
5727	Q13635		Q5VU43
5727	Q59FG5		Q5VU66
5728	P60484		Q5VU72
5728	F6KD01		Q5VUF1
5781	Q06124		Q5VW28
9135	Q15276		Q5VW29
5890	O15315		Q5VWP2
5894	P04049		Q5VX90
5900	Q12967		Q5VXV2
5900	Q8N4Y1		Q5VXV3
5900	Q6ZSD5		Q5W0D7
5900	Q6PCE1		Q5XUU0
5900	Q6KH11		Q60FE2
64901	Q9H2T7		Q66K63
64901	Q546R4		Q66X48
5910	G5E9P9		Q68CP9
5910	Q9BUX6		Q68D63
5910	Q4QQI8		Q6DI00
5910	P52306		Q6DJT9
5910	Q6U7G8		Q6FGF7
5910	E9PH06		Q6FGM0
5910	B3KNU0		Q6FHQ6
5910	Q499L7		Q6FHS9
5914	P10276		Q6FHW4
5914	F1D8N9		Q6FI00
5914	Q6I9R7		Q6I9R7
5914	B8Y636		Q6IBC8
5914	A8K840		Q6IBQ5
5925	P06400		Q6IBR6
64783	Q86VW9		Q6ICP4
64783	Q96T37		Q6ICV4
9401	O94761		Q6IN79
5966	Q04864		Q6IQ50
5979	P07949		Q6KH11
5979	Q9BTX6		Q6MZE2
6098	P08922		Q6MZL5
6146	P35268		Q6N002
6184	P04843		Q6N021
861	Q01196		Q6PCE1
7994	A5PKX7		Q6PI38
7994	Q92794		Q6PIA1
51119	Q9Y3A5		Q6PJH3
54949	Q9NX18		Q6T775
6390	P21912		Q6U7G8
6391	Q99643		Q6UN15
6392	O14521		Q6UUV7
23157	Q548C9		Q6W2J9
23157	Q14141		Q6ZNF9
23157	Q541S4		Q6ZSD5
6418	Q01105		Q701P4
6418	A6NGV1		Q708E9
6418	Q5VXV3		Q70SY1
6418	B2REB8		Q71QC5
6418	Q5VXV2		Q71QC6
29072	Q9BYW2		Q71RF1
23451	O75533		Q7KZU6
23451	A0JLT9		Q7Z497
23451	E9PCH3		Q7Z4J5
23451	Q7Z497		Q7Z538
6421	P23246		Q7Z550
6421	Q86VG2		Q7Z551
6428	B2R6F3		Q7Z6C1
6428	P84103		Q7Z780
6455	Q99961		Q7Z7A1
6455	E7EVZ4		Q86SX1
6455	Q6FGM0		Q86U55
6455	B4DRA1		Q86U86
6491	Q15468		Q86UP2
85414	A8K2U9		Q86VG2
85414	Q96JT2		Q86VS8
6597	P51532		Q86VW9
6597	A7E2E1		Q86VZ1
6597	B1A8Z4		Q86VZ6
6597	Q9HBD4		Q86WM7
6597	B1A8Z6		Q86WV8
6597	B1A8Z7		Q86X94
6597	B1A8Z5		Q86XK2
6597	B3KNW7		Q86Y26
6598	Q17S11		Q86YC2
6598	Q12824		Q8IUD2
6598	Q9H836		Q8IVB0
6608	A4D1K5		Q8IVF1
6608	Q99835		Q8IXJ9
8651	O15524		Q8IXL1
8651	Q4JHT5		Q8IZL2
6657	P48431		Q8IZP0
9901	O43295		Q8N2P0
6427	Q01130		Q8N4C6
6427	Q53FN0		Q8N4Y1
6760	Q15532		Q8N726
6760	Q4VAX0		Q8N8F8
26039	O75177		Q8NAN6
10006	B4DQ58		Q8NAP7
10006	B6VEX3		Q8NEZ4
10006	Q8IZP0		Q8NFG4
10006	B3KX62		Q8NFU7
10006	B6VEX5		Q8NG31
10006	Q5T2R9		Q8NG68
10006	B6VEX4		Q8TBA6
6756	Q16384		Q8TEA2
6757	Q16385		Q8TEF4
6759	O60224		Q8TES3
6759	A8MYD4		Q8TF68
6794	Q15831		Q8WVA9
51684	Q9UMX1		Q8WVQ1
23512	Q15022		Q8WYB5
23512	A8K1U9		Q8WYR3
6850	P43405		Q92466
6850	A8K4G2		Q92560
8148	Q92804		Q92570
8148	Q86X94		Q92574
6886	P17542		Q92597
6887	Q16559		Q92733
6917	P23193		Q92734
6927	P20823		Q92793
6938	Q99081		Q92794
6929	P15923		Q92804
6934	C6ZRJ7		Q92889
6934	C6ZRK5		Q92956
6934	C6ZRJ8		Q92989
6934	F8W7T5		Q93052
6934	Q9NQB0		Q93063
6934	C6ZRK1		Q93074
6934	C6ZRJ9		Q969H0
6934	Q6FHW4		Q969V6
6934	C6ZRK2		Q96AE4
6934	B4DRJ8		Q96AJ9
6934	B9X074		Q96BA8
6934	C6ZRK0		Q96CY4
6934	F8W742		Q96DH6
8115	P56279		Q96E14
54790	Q6N021		Q96E88
7030	B4DIA5		Q96FE8
7030	P19532		Q96FT4
7942	P19484		Q96JT2
10342	G5E9V1		Q96K83
10342	Q92734		Q96L73
10342	Q05BK6		Q96MH1
29844	P0C1Z6		Q96MN4
7037	P02786		Q96MN8
7037	A8K6Q8		Q96MX4
9967	Q9Y2W1		Q96PJ5
8805	O15164		Q96RK0
3195	P31314		Q96RU3
3195	A1L4G3		Q96T37
30012	O43711		Q99081
7113	O15393		Q99453
7113	F8WES1		Q99581
7128	P21580		Q99607
8764	Q92956		Q99612
608	Q02223		Q99626
355	P25445		Q99643
355	Q5T9P3		Q99719
7150	P11387		Q99835
7157	Q53GA5		Q99836
7157	P04637		Q99961
7170	Q5VU66		Q99968
7170	P06753		Q99983
7170	Q5VU72		Q99996
7171	P67936		Q9BQ51
7175	Q99968		Q9BSG9
7175	P12270		Q9BTX6
5987	P14373		Q9BUK0
51592	B3KN30		Q9BUX6
51592	Q9UPN9		Q9BWA2
9321	B2RUT2		Q9BX63
9321	Q15643		Q9BXL7
9321	Q6MZL5		Q9BXW9
7248	B7Z897		Q9BYG9
7248	Q92574		Q9BYW2
7248	Q32NF0		Q9BZ95
7248	Q86WV8		Q9BZE9
7249	P49815		Q9C0K0
7253	F5GYU5		Q9GZQ5
7253	P16473		Q9H165
7253	A0PJU7		Q9H2T7
7253	G3V2A9		Q9H334
150465	Q8NG68		Q9H836
7307	Q01081		Q9HAZ2
7307	Q71RF1		Q9HB96
7307	Q7Z780		Q9HBD4
7307	Q701P4		Q9HBE1
9098	P35125		Q9HBE5
7428	P40337		Q9HC35
143187	Q5W0D7		Q9HC73
143187	Q96AJ9		Q9HCM3
7454	P42768		Q9HD26
7468	O96028		Q9NPC3
54904	Q9BZ95		Q9NPI8
11197	Q9Y5W5		Q9NQB0
7486	Q14191		Q9NQC7
7486	Q59F09		Q9NQX3
7490	P19544		Q9NQX6
7490	B3KSA5		Q9NX18
7490	Q6PI38		Q9NYV4
7490	E9PMK7		Q9NZN5
7490	E9PP08		Q9NZQ3
139285	Q5JTC6		Q9NZQ7
7507	P23025		Q9UBW7
7508	E9PH69		Q9UDY8
7508	Q01831		Q9UER7
7508	B4DIP3		Q9UFD5
7514	B3KWD0		Q9UH73
7514	O14980		Q9UHB7
7531	P62258		Q9UHD8
7704	Q05516		Q9UIF7
7750	Q9UBW7		Q9UKJ5
23598	Q9HBE1		Q9UKU0
55422	Q9NQX6		Q9ULV8
55422	Q71QC5		Q9UM73
55422	Q71QC6		Q9UMX1
55422	Q68D63		Q9UNA1
171017	Q8TF68		Q9UPN9
25925	Q96K83		Q9UPY3
7555	Q4JGY1		Q9Y2W1
7555	A8K7V4		Q9Y3A5
7555	E9PDR7		Q9Y5J3
7555	Q4JGY0		Q9Y5Q3
7555	Q5U0E9		Q9Y5W5
7555	P62633		Q9Y693
8233	Q15696		Q9Y6K1

## Sheet: AGING uniprot
EntrezGene ID	UniProt ID		Unique IDs
111	O95622		A0S0A6
111	B7Z2C7		A0S0A7
111	B7Z8A6		A0S0A8
392	Q07960		A2I2N6
406	O00327		A6NEF6
406	A2I2N6		A8K591
472	Q13315		A8K882
545	Q13535		A9XTE5
581	Q07812		B1A4G6
672	Q3LRJ6		B1A4G7
672	P38398		B1A4G9
672	Q1RMC1		B1A4H0
672	Q6IN79		B1AHC8
672	E9PFZ0		B1ALW1
701	O60566		B2R6M6
9184	O43684		B7Z2C7
835	Q9BZL0		B7Z8A6
835	P42575		D3DXD9
835	D3DXD9		E5KNU5
835	E9PDN0		E5KRX5
857	A9XTE5		E9PD02
857	Q2TNI1		E9PDN0
857	Q03135		E9PFR2
857	Q7Z4F3		E9PFZ0
857	Q59E85		O00327
1026	P38936		O14746
1026	Q6FI05		O15297
1050	P49715		O43684
1051	P17676		O60566
11200	O96017		O60744
10229	Q99807		O75360
2202	Q12805		O75844
2202	B2R6M6		O95622
2068	P18074		O95985
2068	Q7KZU6		O96017
2072	Q92889		P00749
8074	Q9GZV9		P01241
2305	Q08050		P02545
2305	Q53Y49		P04637
2305	A8K591		P05019
2688	A6NEF6		P06213
2688	B1A4H0		P08069
2688	B1A4G6		P10599
2688	P01241		P10912
2688	B1A4G7		P12235
2688	B1A4G9		P12956
2690	P10912		P13010
2692	Q02643		P17676
2879	P36969		P18074
3070	Q9NRZ9		P28069
3351	P28222		P28222
3479	Q13429		P29353
3479	E9PD02		P29474
3479	Q5U743		P35558
3479	P05019		P35568
3479	Q14620		P36969
3479	Q59GC5		P38398
3480	P08069		P38936
3643	P06213		P42575
3667	P35568		P43246
8660	Q9Y4H2		P49715
8660	Q9P084		P49736
9365	Q9UEF7		P54098
4000	P02545		P55851
4171	P49736		P78406
4249	Q09328		Q02643
4436	P43246		Q03135
4482	Q9UJ68		Q06830
79661	Q96FI4		Q07812
4846	A0S0A7		Q07960
4846	P29474		Q08050
4846	A0S0A8		Q09328
4846	E9PFR2		Q12805
4846	A0S0A6		Q13219
5069	Q8IWT8		Q13315
5069	Q7Z613		Q13429
5069	Q13219		Q13535
5069	Q86YM8		Q14620
5074	Q96IZ0		Q15526
5105	P35558		Q15554
5449	P28069		Q1RMC1
5328	P00749		Q2TNI1
5328	Q59GZ8		Q3LRJ6
5428	E5KNU5		Q53GA5
5428	P54098		Q53Y49
8493	Q6P991		Q59E85
8493	O15297		Q59GC5
5052	Q06830		Q59GZ8
5626	O75360		Q5U743
8480	P78406		Q6FI05
8480	A8K882		Q6IN79
6464	P29353		Q6P991
51548	Q8N6T7		Q7KZU6
291	P12235		Q7Z4F3
10273	Q9UNE7		Q7Z613
6834	Q15526		Q86YM8
6834	E5KRX5		Q8IWT8
7014	Q15554		Q8N6T7
7015	O14746		Q92889
8940	O95985		Q96FI4
7157	Q53GA5		Q96IZ0
7157	P04637		Q99807
8626	Q9H3D4		Q9BZL0
7295	O60744		Q9GZV9
7295	B1ALW1		Q9H3D4
7295	P10599		Q9NRZ9
7351	P55851		Q9P084
7520	P13010		Q9UEF7
2547	P12956		Q9UJ68
2547	B1AHC8		Q9UNE7
10269	O75844		Q9Y4H2
